# Supplementary material for: Premalignant Oligodendrocyte Precursor Cells Stall in a Heterogeneous State of Replication Stress Prior to Gliomagenesis
Source: Oxford University Press journal article supplement (doi:10.1158/0008-5472.can-20-1037), 2021-02-02
Supplement: 00085472can201037-sup-240357_3_supp_6873592_qnkplt.xlsx [file 00085472can201037-sup-240357_3_supp_6873592_qnkplt.xlsx]

## Sheet: 10cRNA-seq - 12 dpi
Female ONLY	Male ONLY	RHEGs
1500009L16Rik	0610040J01Rik	1110032A03Rik
1700017B05Rik	1110008F13Rik	1810041L15Rik
2700062C07Rik	1110017D15Rik	4933427D14Rik
2810428I15Rik	1110059E24Rik	A230065H16Rik
4930533O14Rik	1600002K03Rik	Acaa2
6430573F11Rik	1700003E16Rik	Acp2
Aamdc	1700025G04Rik	Adam11
Aar2	1700047I17Rik2	AI593442
Abca8a	2610008E11Rik	Aimp2
Abcd4	4833420G17Rik	Ajap1
Abcg2	4833439L19Rik	Alcam
Abhd14a	9530077C05Rik	Aldh1a1
Abhd17b	9930021J03Rik	Alg3
Abhd6	Aarsd1	Anapc2
Abraxas2	Abat	Ankrd40
AC109138.2	Abhd12	Anxa3
AC149090.1	Acap3	Ap3d1
Aco1	Ace2	Apeh
Acot13	Acsbg1	Api5
Actb	Acsl5	Arfrp1
Actr8	Acta2	Arnt2
Adam19	Actr1b	As3mt
Adar	Acvr2b	Asphd2
Adck1	Adam10	Atg3
Add1	Adgra2	Axl
Adgrl4	Adgre5	Bmp1
Adprhl2	Adhfe1	Cbln2
Ago1	Adipor2	Ccdc12
Ago3	Afap1l1	Cckbr
Agt	Afg1l	Cdc42
Ahi1	Aifm3	Chchd6
Ahnak	Aip	Cipc
AI314180	Akr1c18	Clk1
AI413582	AL607105.1	Cog4
AI464131	Anapc10	Cryab
Aida	Ankhd1	Ctc1
Aif1l	Anks1	Dclk1
Akap7	Anxa2	Dgcr2
Akr7a5	Ap4s1	Dnajc19
Aldh1l1	Apex1	Donson
Alg14	Apoo	Egflam
Alg2	Arhgap33	Eif3k
Amd2	Arl1	Fam118a
Amotl1	Arpc2	Fam234b
Anapc15	Arxes2	Fstl1
Anapc5	Asns	Ggt1
Angptl2	Atf4	Gm996
Ankmy2	Atf7	Gper1
Ankrd11	Atp13a5	Hrct1
Ankrd13d	Atp6v0a2	Id3
Ankrd17	Atp6v0c	Ifit3
Ankrd37	Atp6v0e	Ift74
Ankrd6	Atp6v0e2	Igfbp7
Ano1	Atp6v1d	Ilkap
Ano10	Atp6v1e1	Immt
Ano6	B4galt1	Kcnip4
Anp32b	B9d2	Lemd1
Anxa6	Banf1	Lgals1
Aox1	Bcan	Ltbp4
Ap1m1	Becn1	Lyrm2
Ap2s1	Bex2	Maf1
Ap3s2	Bfar	Mb21d2
Apod	Bid	Mfge8
Apold1	Bin3	Mid1
Arfgap1	Blmh	Mlycd
Arfgap2	Bloc1s5	Mrfap1
Arhgap22	Blvrb	Mtap
Arhgap31	Bnip1	Mtus2
Arhgdib	Borcs7	Myl9
Arhgdig	Borcs8	Nbl1
Arhgef1	Brinp3	Ndufa11
Arhgef12	Brix1	Necab2
Arih1	Btbd11	Nek9
Arl5a	Bub3	Neu4
Armc10	Bysl	Nmb
Armc9	C1qtnf6	Npc2
Armcx2	Cacng5	Nrde2
Armt1	Cacybp	Nsa2
Arsb	Caln1	Nudt16l1
Art3	Camk1g	Pald1
Asb1	Canx	Pglyrp1
Asrgl1	Capzb	Pla2g4e
Aste1	Cars2	Plac9b
Atad3a	Cartpt	Pnmal2
Atat1	Cbarp	Polg
Atg13	Cbr4	Polr3h
Atg7	Cbs	Prelp
Atg9a	Cc2d2a	Prr36
Atp1b2	Ccdc22	Psmb1
Atp2b1	Ccdc97	Psmd3
Atp2b4	Ccny	Ptpn5
Atp5f1	Cd248	Rab3b
Atp6ap1l	Cd72	Rarres2
Atp6ap2	Cdc42ep4	Rbp1
Atp6v1g2	Cdk10	Rfc1
Aup1	Cdk2ap2	Rgs5
B2m	Cdk5rap2	Rnf214
B3galt2	Cdpf1	Sae1
B3galt6	Cep89	Scamp4
B3glct	Cers4	Scgn
B4galnt4	Cggbp1	Serpinf1
B9d1	Cherp	Sgsm3
Bag6	Chmp1a	Sipa1
Bbs2	Chpf	Sirt7
BC003331	Chrna4	Slc19a1
BC003965	Chst8	Slc35a1
BC005561	Cisd1	Slc35b2
Bcap31	Ciz1	Slc4a2
Bcas1	Cldn10	Slc6a8
Bcas2	Clec2l	Sox6
Bdh1	Clns1a	Sphkap
Bex4	Clpp	Spp1
Bgn	Clptm1l	Sqstm1
Blvra	Cmtm5	Sri
Bnip2	Cnbp	Strip1
Bpgm	Cntn4	Taf11
Brd8	Commd5	Tagln2
Bsg	Copa	Tars2
Btf3	Cops3	Tbcb
C1galt1c1	Copz2	Tbxa2r
Cab39	Coq4	Tcea2
Cacna1e	Creb1	Thoc5
Cacna1h	Crebrf	Thy1
Cacng2	Crtap	Timp3
Cacng4	Cs	Tmcc1
Cad	Csnk2b	Tmem254c
Cand1	Ctsb	Tnik
Cap2	Ctsc	Tnxb
Capns1	Ctsh	Tonsl
Car4	Ctsl	Trim27
Carhsp1	Ctsz	Tspan4
Casc3	Cttn	Tuba8
Casq2	Cuedc2	Txnl4a
Cavin3	Cwc15	Uaca
Ccdc191	Cwc27	Vip
Ccdc28b	Cyp27a1	Vipas39
Cck	Cyp46a1	Vps25
Ccnt2	D430041D05Rik	Wdr77
Cct2	Dctn2
Cct4	Dctn3
Cct5	Ddx20
Cd276	Ddx39
Cd63	Deaf1
Cd9	Decr1
Cd93	Desi1
Cdan1	Dgat2
Cdc16	Dgkg
Cdh13	Dhx36
Cdhr1	Dlst
Cdip1	Dmxl2
Cdipt	Dnajc3
Cdkn2aipnl	Drg2
Cds1	Dscam
Cds2	Dtnbp1
Cdv3	Dut
Cebpz	Ece1
Chchd5	Ech1
Chgb	Ednra
Chil1	Eef1d
Chmp3	Ehbp1
Chn1	Ehd2
Chrac1	Eif2d
Cib1	Eif3e
Ckb	Emid1
Clasrp	Eps8l2
Clec16a	Erh
Clip3	Exoc5
Clk2	Extl2
Cln6	Fah
Clpx	Fahd2a
Clybl	Fam171b
Cmip	Fam20a
Cnn2	Fam216a
Cnp	Fam8a1
Cnpy2	Fam92a
Cntnap2	Fbxo18
Cog1	Fdps
Coil	Fis1
Col15a1	Fkbp3
Col1a2	Fn3k
Col4a3bp	Ftsj1
Col6a1	Fuca2
Commd6	Gab1
Commd9	Gad1
Comt	Gad2
Copg1	Gas8
Coprs	Gfm1
Cops8	Gkn3
Coq9	Glud1
Coro1b	Gm12258
Coro1c	Gm21811
Coro2b	Gm42372
Cox4i1	Gm42420
Cox4i2	Gm4924
Cpe	Gm5641
Cplx1	Gm7666
Cpne6	Gne
Cpne7	Gns
Creb3	Gon4l
Crebbp	Gpd1
Crip2	Gpr37l1
Crtac1	Gpx7
Cry2	Grn
Cspg4	Grtp1
Cst3	Gsk3b
Ctnna1	Gstm1
Ctnnbip1	Gtf2i
Ctps2	Gtf3c6
Ctxn3	Hapln4
Cyb561d1	Hars2
Cyb5a	Hax1
Cyb5r3	Hbp1
Cyfip2	Hcfc1r1
Cyp2j6	Heatr1
Daam2	Hexb
Dbx2	Hey1
Dcn	Hist1h1c
Dctn5	Hmgcs2
Dcx	Hnrnpa2b1
Ddah1	Hnrnpm
Ddah2	Hs2st1
Ddc	Hsp90aa1
Ddt	Hspa12a
Ddx25	Hspa12b
Ddx39b	Hspa4l
Ddx50	Htra1
Dgkz	Iah1
Dhrs7b	Idh3g
Diablo	Igbp1
Diaph2	Igfbp6
Dimt1	Il18
Dirc2	Il6st
Dnaja4	Immp1l
Dnm3	Imp3
Dock6	Impact
Dolk	Inpp1
Dolpp1	Inpp5k
Dpp7	Ints4
Dpysl2	Ipcef1
Dpysl5	Ipo13
Drg1	Irgq
Drp2	Itga9
Dus1l	Jkamp
Dync1h1	Jmjd6
Dynlt3	Kcnb2
Dyrk2	Kcnc1
Eci2	Kcnj3
Ecm1	Kcnj8
Efcab14	Kctd2
Efemp2	Klhl22
Efna3	Kyat1
Efr3a	Lamp5
Eftud2	Larp6
Ei24	Las1l
Eid2	Ldhd
Eif3a	Leng1
Eif4ebp3	Lgals3bp
Eif4h	Lgi1
Elof1	Lima1
Elovl5	Lin7b
Elp3	Llph
Emc2	Lonp1
Emcn	Lpp
Eng	Lrba
Epb41l2	Lrrc8a
Ephx1	Lrrn2
Eps8	Lxn
Ercc1	Ly6a
Erp29	Ly6c1
Esd	Ly6e
Etnk1	Ly6g6e
Exoc6b	Lyn
Exoc7	Maged1
F11r	Manf
Fads1	Mapk1ip1
Fam104a	Mbnl1
Fam118b	Mecr
Fam160b2	Med22
Fam210a	Med27
Fam212b	Med8
Fam217b	Metap1d
Fam32a	Mgll
Fam58b	Mgp
Fam96b	Mgrn1
Fam98a	Mkrn2
Fbxo42	Mnat1
Fbxo7	Morn4
Fcgrt	Mpp5
Fdx1l	Mrpl2
Fem1b	Mrpl36
Fgf1	Mrpl39
Fgf13	Mrpl40
Fgfr1	Mrpl42
Fh1	Mrpl47
Fkbp9	Mrpl49
Flad1	Mrps26
Flrt1	Mrps27
Flt1	Mrps7
Flywch2	Mterf2
Fmnl3	Mtus1
Fnbp1l	Mybbp1a
Fntb	Nadk
Foxf2	Nat10
Fryl	Nat8f4
Fto	Nat9
Fuca1	Nav3
Fxyd6	Ncoa5
Fyttd1	Ndrg1
Gabarapl1	Ndrg3
Gabra1	Ndufb6
Gabra5	Nek6
Gal	Nelfb
Galnt15	Nelfcd
Ganab	Nelfe
Garem1	Nfx1
Gchfr	Ngrn
Gcsh	Nicn1
Gde1	Nipal2
Gdpd5	Nol7
Gfra1	Notch4
Gfra4	Nr2f1
Ggct	Nr4a3
Ggt5	Nrsn1
Gjc1	Nsmaf
Gkap1	Ntan1
Glrx3	Ntrk3
Gls2	Nucb1
Gm10039	Nudt2
Gm10273	Nup85
Gm13841	Oas1a
Gm14410	Ogfod1
Gm16286	Ogfod2
Gm20390	P3h1
Gm2564	Pak1ip1
Gm28438	Pak3
Gm6644	Papola
Gm8210	Parl
Gm9780	Pcbd1
Gnal	Pcbp4
Gng11	Pcdh19
Gng13	Pcdha4
Golga3	Pcolce
Golga7b	Pcsk2
Gp1bb	Pde4b
Gpat4	Pdgfrb
Gpatch2l	Pgam2
Gpd2	Pgap1
Gpld1	Phldb1
Gpr4	Phrf1
Grin2a	Pigs
Grm1	Pik3r6
Gsta4	Pithd1
Gsto1	Pla1a
Gtf2a2	Pla2g7
Gtf3c5	Plekhb1
H2-Ab1	Plod2
H2afv	Plxdc1
Hars	Plxnc1
Hbb-bt	Pnck
Hddc2	Polr2a
Hectd1	Polr2b
Hemk1	Polr3e
Hepacam	Pomgnt2
Hic1	Ppia
Hif1a	Ppil4
Hist3h2a	Ppm1f
Hmg20a	Ppm1g
Hnrnpf	Ppp1r12c
Hnrnph1	Ppp2r1a
Hpcal4	Ppp6c
Hpf1	Pqbp1
Hsd17b12	Pqlc2
Hsd17b4	Prickle1
Hsp90b1	Prkab2
Hspa8	Prkar2a
Hspe1	Prkd3
Icam2	Proser1
Ice1	Prpf31
Id1	Prss12
Idh3a	Psmb10
Ifi27l2a	Psmc1
Ifi35	Psmc3
Ifitm1	Psmc6
Ifitm3	Psmd8
Ift20	Pstk
Ift52	Ptdss2
Igsf11	Ptgs1
Ikbkap	Pth1r
Il13ra1	Pts
Il34	Puf60
Impdh2	Pvalb
Inafm1	Pxn
Ing1	Pycrl
Ing2	Qdpr
Ints1	Rab26
Ints14	Rad51d
Ippk	Rap1gap2
Iqsec1	Rap1gds1
Itga1	Rapgef3
Itih5	Rasl12
Itm2a	Rbm5
Itm2b	Rbm6
Itm2c	Rbx1
Itpr3	Retsat
Ivd	Rfesd
Kalrn	Rflna
Kank2	Rgs11
Kank3	Riiad1
Katnal1	Rit1
Kcnip2	Rnf180
Kcnip3	Rnf185
Kcnj10	Rnf7
Kdelr2	Rnpepl1
Kidins220	Rph3a
Kif5b	Rpl18
Kifc3	Rpl29
Kirrel3	Rpp14
Kitl	Rps4x
Klf2	Rps6kb2
Klhdc8b	Rpsa
Klhl6	Rras
Kmt2a	Rrp1
Kmt5b	Rubcn
Knop1	Rxrg
Kpnb1	S100a10
Lama4	S100a5
Lamb1	Sars
Lamb2	Sbk1
Lamc1	Sbno1
Lamc3	Sccpdh
Larp7	Scg5
Ldah	Scnm1
Ldoc1l	Sdccag3
Letm1	Sec22a
Lgr6	Selenbp1
Lhfp	Sema4f
Lhfpl2	Sept6
Lhfpl4	Serhl
Limd1	Set
Lims1	Setd6
Lin7a	Sh2b2
Lman2l	Sik3
Lmo2	Sike1
Lrpap1	Sin3b
Lrrc51	Sipa1l1
Lrrtm3	Siva1
Lrtm2	Slc25a46
Lsm6	Slc25a5
Lysmd1	Slc29a2
Magi2	Slc2a6
Map1s	Slc35b4
Map6	Slc38a2
Map7d2	Slc38a5
Mapk7	Slc39a6
Mapk8ip3	Slc39a7
Mapt	Slc4a3
Mast2	Slc5a6
Mboat2	Slu7
Mbp	Smap1
Mcee	Smarcd2
Mcfd2	Smc1a
Mcrip1	Smyd5
Mcub	Snrpe
Mcur1	Snw1
Mdp1	Snx16
Med10	Snx32
Med4	Spns1
Mettl23	Srp72
Micu1	Srrt
Mien1	Ssrp1
Mindy1	Stard3nl
Mlh1	Stat1
Mmaa	Stk19
Mob2	Stmn2
Mobp	Stoml2
Mocs2	Strada
Morf4l1	Suds3
Mpi	Sugp2
Mpp6	Synj2bp
Mrnip	Syt1
Mrpl13	Syt11
Mrpl16	Tac2
Mrpl28	Taf1
Mrpl41	Tagap1
Mrps18b	Tax1bp1
Mrps18c	Tbc1d4
Ms4a15	Tbcd
Msantd4	Tcf19
Msl1	Tcta
Mtch2	Tdg-ps
Mtmr10	Tgfb1i1
Mtmr11	Tgoln1
Mycbp2	Thoc3
Myg1	Thoc7
Naa35	Thtpa
Nacad	Thumpd3
Nampt	Timm10
Napa	Timm44
Narfl	Tinf2
Natd1	Tle2
Naxe	Tm4sf1
Nbea	Tmbim4
Ncf2	Tmco1
Nckipsd	Tmed1
Ndel1	Tmed3
Ndrg2	Tmem161a
Ndst2	Tmem170b
Ndufa10	Tmem185a
Ndufaf3	Tmem199
Ndufaf5	Tmem200c
Ndufs1	Tmem38a
Ndufv1	Tmem55b
Neu1	Tmub2
Neurl4	Tnip1
Nfatc4	Tomm5
Nfil3	Top2b
Nfkbia	Tor1b
Nhp2	Tpst2
Nid1	Trappc1
Ninj1	Trappc4
Nkap	Trf
Nme6	Trim46
Nol12	Trim56
Notch3	Trmt12
Npepl1	Trmt6
Nppa	Ttc39c
Nrcam	Tuba1b
Nrep	Tubb5
Nsmce4a	Tubgcp3
Nsrp1	Txlng
Nt5c3b	Uba1
Ntmt1	Uba5
Ntrk2	Ubac1
Nudt16	Ubl4a
Nudt9	Ubxn1
Nup35	Uggt1
Nxf1	Umps
Nxn	Unc13b
Oat	Upp2
Oaz1	Usp13
Ogdh	Utp3
Ogfrl1	Vangl1
Ogt	Vdac3
Olig1	Vps35
Omp	Vps37d
Ophn1	Vsnl1
Orc3	Vti1b
Osgep	Vtn
Ostc	Wdr13
Ostf1	Wdr26
Oxa1l	Wnt7a
Oxct1	Xylt2
Pabpn1	Yars
Pacs1	Zc3h8
Paip2	Zcchc18
Pak1	Zcchc4
Papd5	Zdhhc2
Paqr8	Zfp212
Parp12	Zfp334
Parp6	Zfp513
Paxx	Zfp629
Pbxip1	Zfp644
Pcdha11	Zfp692
Pcx	Zfp810
Pde5a	Zfp91
Pde8b	Zmym5
Pdgfa	Zscan18
Pdgfrl	Zscan21
Pdlim2	Zswim1
Pdpn
Pear1
Pef1
Peg3
Peli2
Pex19
Pfkfb2
Pfn2
Pgbd5
Pgpep1
Pgrmc1
Pgs1
Phf5a
Phgdh
Phka2
Phpt1
Phyh
Pigf
Pik3c3
Pik3r3
Pitpnm1
Pitpnm3
Pkm
Pkn1
Pla2g6
Plagl1
Plat
Plcxd2
Plekhb2
Plekhg2
Plekhg3
Pllp
Plp1
Plp2
Pltp
Pmepa1
Pnp
Polb
Poldip2
Polk
Pon2
Pop4
Por
Ppan
Ppfia1
Ppfibp1
Ppp1ca
Ppp1r13b
Praf2
Prdx2
Prdx5
Preb
Prkacb
Prkar2b
Prkcsh
Prkcz
Prmt9
Prpf4
Prpf4b
Prrx1
Psat1
Psmb8
Psmc4
Psmd12
Psmd2
Psme2
Ptcd3
Ptch1
Ptprb
Ptprk
Pum3
Pus1
Pygb
Pyurf
Rab34
Rad50
Rangrf
Rasa3
Rasd2
Rasgrp1
Rasgrp3
Raver2
Rbm10
Rbm43
Rbmxl1
Rcan1
Rdh5
Reln
Rev1
Rexo2
Rfc2
Rftn2
Rgs12
Rhbdf1
Rhoq
Rin2
Ripk2
Rit2
Rlbp1
Rlim
Rmnd1
Rnd2
Rnf146
Rnf25
Rnf41
Robo4
Rogdi
Rpl23a
Rpl36al
Rpl5
Rpl7
Rpp25
Rps2
Rps2-ps13
Rps5
Rpusd1
Rragc
Rrbp1
Rsph9
Rtca
Rtfdc1
Rtn4rl1
S100a1
S100a6
S1pr3
Sac3d1
Sap30bp
Sar1a
Scap
Scarb2
Scg2
Scn3b
Sco2
Scrg1
Sdc3
Sec11a
Sec11c
Sec24c
Sec31a
Selenoo
Sept4
Sept9
Serpina3n
Serpinb6a
Sgpp2
Sh2b3
Sh3bgrl
Sh3bgrl2
Sh3glb2
Shroom2
Slc13a3
Slc15a4
Slc20a1
Slc22a8
Slc25a18
Slc25a19
Slc25a29
Slc27a4
Slc2a1
Slc30a10
Slc35c2
Slc37a4
Slc38a3
Slc6a20a
Slc7a10
Slc7a11
Slc7a6
Slco1a4
Slco1c1
Slco3a1
Smarcb1
Smc5
Smg9
Smim14
Smoc1
Smox
Smpd2
Smtn
Snapc4
Snrk
Snx11
Snx14
Snx18
Snx3
Snx6
Sod3
Sorbs2
Sorl1
Sparc
Sparcl1
Spata7
Specc1
Spout1
Spsb2
Spsb3
Sptlc1
Srgap2
Srp54b
Srprb
Srsf11
Sstr3
Ssx2ip
St3gal2
St7l
St8sia3
Stab1
Stard10
Stip1
Stk32c
Stoml3
Stradb
Stt3a
Stx12
Stx5a
Stxbp2
Sub1
Suclg1
Sult1a1
Sumo1
Sumo3
Surf1
Syn3
Synj1
Syt17
Syt6
Syt7
Tac1
Tacr1
Tarbp2
Tbc1d20
Tbc1d22a
Tbrg1
Tek
Ten1
Tgfbi
Th
Thoc2
Thrsp
Timm8b
Tinagl1
Tm2d3
Tm7sf2
Tm9sf3
Tmbim6
Tmem109
Tmem119
Tmem123
Tmem160
Tmem176a
Tmem176b
Tmem186
Tmem208
Tmem229a
Tmem254b
Tmem43
Tmem60
Tmem63a
Tomm34
Tomm40l
Tpbgl
Traf2
Trappc5
Trex1
Trh
Trim26
Trim37
Trim62
Trmt1
Trnp1
Trp53inp2
Tsen15
Tsen34
Tsn
Tspan17
Tspan33
Tspan7
Tspan9
Tssc1
Ttyh1
Tulp3
Twf2
Txn2
Tyro3
Tyrobp
Tyw1
Uba3
Ubac2
Ube3b
Ublcp1
Uhrf1bp1l
Uqcrc1
Uqcrh
Urgcp
Urod
Usp11
Usp14
Usp4
Usp42
Usp48
Usp5
Usp6nl
Utrn
Vamp8
Vcan
Vcp
Vim
Vldlr
Vmp1
Vps13d
Vps18
Vps41
Vps9d1
Vstm4
Vwa1
Washc1
Wdr11
Wdr12
Wdr19
Wdr61
Wsb1
Xylt1
Ybx1
Yif1a
Yipf2
Zbtb48
Zcchc6
Zdhhc16
Zdhhc4
Zdhhc5
Zer1
Zfand2a
Zfp260
Zfp282
Zfp318
Zfp335
Zfp35
Zfp511
Zfp536
Zfp553
Zfp612
Zfp637
Zfp68
Zfp788
Zfp954
Zfp956
Zfpl1
Zfyve26
Zmat2
Zranb1
Zscan29

## Sheet: 10cRNA-seq - 90 dpi
Female ONLY	Male ONLY	RHEGs
0610010K14Rik	1110008F13Rik	A230065H16Rik
1110032A03Rik	1110017D15Rik	Abhd10
1110034G24Rik	2010111I01Rik	Acd
1110059E24Rik	2310022B05Rik	Acrbp
1500011B03Rik	4930523C07Rik	Adamtsl5
1600002K03Rik	4933434E20Rik	Adgrl4
1700001L19Rik	A830080D01Rik	Afg3l1
1700029J07Rik	Aamdc	Aif1
1810030O07Rik	Aars	Aldh3a2
1810055G02Rik	Abcb7	Alg9
2010300C02Rik	Abcf3	Alkbh7
2210013O21Rik	Abi1	Amph
2310061I04Rik	Abl2	Anapc7
2410004B18Rik	AC149090.1	Ankrd63
2410131K14Rik	AC175538.2	Aplp2
2510002D24Rik	Acp2	Arhgap42
2610008E11Rik	Acvrl1	Arhgdig
2610301B20Rik	Adamts15	Arl1
2810021J22Rik	Adamts4	Aste1
2810459M11Rik	Adgrg1	Astn1
2900011O08Rik	Aff3	B230118H07Rik
3110035E14Rik	Agpat5	B4galt4
3110062M04Rik	Agt	Bap1
3632451O06Rik	AI464131	Brcc3
4833420G17Rik	Aif1l	C1qb
4933407L21Rik	Akirin2	Cacna1h
5730559C18Rik	Akr1e1	Capn15
6430548M08Rik	Akt3	Cd74
6430573F11Rik	Aldh7a1	Cd83
9530068E07Rik	Alg5	Cdhr1
A230050P20Rik	Amd1	Cds1
Aarsd1	Anapc10	Chl1
Abat	Angptl2	Clcn5
Abca8b	Anxa3	Cldn11
Abcd3	Anxa4	Clptm1l
Abcg2	Anxa5	Cnst
Abhd11	Anxa6	Col4a1
Abhd6	Ap2b1	Cops6
Ablim3	Aplp1	Cpne7
AC161829.1	Apmap	Cry2
Acad8	Apoo	Cst3
Acadvl	Appl1	Ctsb
Acat1	Arf3	Ctxn3
Ace2	Arhgap1	Cxadr
Aco1	Arl5a	Cyb5a
Acsbg1	Arl6ip1	D2Bwg1423e
Acsf3	Armc9	Dmwd
Acss1	Arrb1	Dnajc5
Acta2	Ascc2	Dph3
Actl6b	Asphd2	Dync1i1
Actr1b	Atad3a	Dzip1
Acvr1b	Atg12	Eef1akmt1
Adam10	Atl1	Elp2
Adam11	Atp1b1	Eml1
Adam22	Atp6v0b	Epdr1
Adam33	Atraid	Erbb3
Adar	Aup1	Esf1
Adcy2	BC022687	Fads3
Adcy3	Bckdha	Faf1
Adcy9	Bcl7b	Fahd2a
Adcyap1r1	Bcl9	Fam114a1
Add2	Bean1	Fam192a
Adgra1	Bet1l	Fam212b
Adipor2	Bex1	Fam32a
Adra2c	Bod1l	Fam53a
Aebp1	Bop1	Fam57a
Aen	Bpgm	Fam69b
Afap1l1	Brox	Fggy
Afg1l	Bsn	Flot1
Ahnak	Calm2	Fth1
AI413582	Camkv	G6pdx
AI593442	Capn7	Gab2
Aifm2	Cbln2	Gabra1
Aifm3	Cbx3	Gdap1l1
Aimp1	Ccdc136	Gkn3
Aimp2	Ccdc191	Gm14295
Aip	Ccdc39	Gm34583
Ak1	Cck	Gm4660
Ak2	Cckbr	Gm7666
Akt2	Ccm2l	Gm8430
AL607105.1	Ccnd3	Gmpr2
Alad	Cd52	Gpaa1
Aldh1a1	Cd68	Gpatch4
Aldh1l1	Cdc42	Gpx7
Aldh5a1	Cdk10	Gusb
Als2	Cdk2ap2	H13
Anapc2	Cdk5rap3	Hars
Ankmy2	Cep89	Hspa12a
Ankrd26	Cers4	Ice2
Ankrd6	Cfap100	Idua
Ano10	Chchd2	Ifitm3
Anxa7	Chd6	Ints1
Ap2a2	Chil1	Itfg1
Ap3m2	Chkb	Itga1
Ap5s1	Chmp4b	Ivd
Aph1a	Ciao1	Kcnt1
Apip	Cldn5	Kctd12
Apod	Clpb	Klhdc8a
Apold1	Clstn2	Kmt5b
Aqp1	Clta	Kxd1
Arhgap18	Cnbp	Lamb2
Arhgap32	Cnih1	Larp7
Arhgef15	Cnot6l	Ldlrap1
Arhgef17	Cnpy2	Lgr6
Arhgef4	Cntnap2	Lrp10
Arl4c	Col9a3	Lrrc51
Arl8b	Comt	Luc7l
Armc5	Coq2	Ly6a
Armc6	Coq7	Marc2
Armcx1	Coro1b	Mbp
Armt1	Cox7b	Mcm6
Arpc1a	Cp	Med8
Arpc1b	Cpd	Med9
Art3	Creg1	Mgp
Asap1	Crtap	Micu1
Asb2	Ctdspl	Mllt11
Asic2	Ctnnbip1	Mmadhc
Atg101	Ctsd	Mmd2
Atg4b	Ctss	Mog
Atmin	Cttnbp2	Mpi
Atp13a5	Cyb5b	Mroh1
Atp1a2	Cyp2d22	Mrpl19
Atp2b1	Cys1	Mrpl22
Atp2b4	D2hgdh	Msl3l2
Atp5j	Dab1	Msra
Atp5s	Dbx2	Mtus2
Atp6v0a2	Dctpp1	Mydgf
Atp6v0e2	Dcxr	Myl9
Atp6v1b2	Ddah2	Nanos1
Atp9a	Ddhd1	Nav2
Auh	Ddit3	Ndufa9
Avpi1	Ddit4l	Nefm
Axl	Dennd5a	Nek9
B4galnt1	Dgat2	Neu4
B4galt2	Dhrs3	Neurl1a
Babam2	Diablo	Ngly1
Bace1	Dio2	Nop9
Banp	Dlst	Npas4
Bax	Doc2g	Nrd1
BC017643	Dpm2	Nup35
Bcap31	Dusp14	Oaf
Bcar1	Dzank1	Opalin
Bcat1	Ece1	Osbpl5
Bcdin3d	Eci2	Ostm1
Bckdk	Efcab2	Otulin
Bcl2	Egln2	Paqr6
Bcl7c	Ehd1	Pcnt
Bend6	Ehd4	Pcp4
Bgn	Ei24	Pcyt2
Bloc1s2	Eif1ax	Pdhb
Bloc1s5	Eif2b3	Pgm2l1
Bmp1	Eif3g	Pgs1
Bmp7	Eif4a3	Phf20
Bmpr2	Eif4b	Phf5a
Bms1	Elmod1	Phldb1
Borcs8	Eloa	Pim2
Brd7	Emb	Plekhb1
Brf1	Emc9	Pmvk
Brinp1	Enah	Poglut1
Bsg	Endod1	Polr2a
Btbd11	Eno3	Polr3h
BTF3L4	Epas1	Psma3
Btg1	Eps8l2	Psme1
Bysl	Etfb	Qars
C1qtnf2	Evi5	Rab3b
C1qtnf5	Faap20	Ralgds
C2cd2l	Fam120b	Rangrf
C4b	Fam124a	Rap1a
C87436	Fam149b	Rars
Cables1	Fam171b	Rasd2
Cacng5	Fam183b	Resp18
Cactin	Fam20a	Rgs5
Calb1	Far2	Rmnd1
Calb2	Fcgr1	Rmnd5b
Cald1	Fcrls	Rnf215
Camk1g	Fez1	Rpap2
Camkk1	Fn1	Rpl5
Camsap1	Fnbp1l	Rufy3
Camsap3	Fnta	Serpina3n
Cap2	Foxf2	Slc13a3
Capn2	Frmd8	Slc2a1
Capns1	Ftsj1	Slc2a8
Car4	Fuca2	Slc30a10
Carhsp1	Fuk	Slc38a5
Cartpt	Fxr1	Slc39a6
Cbfa2t2	G3bp2	Slc44a1
Cc2d2a	Gabarapl1	Smyd2
Ccdc124	Galnt6	Snrnp25
Ccdc137	Garem2	Sphk2
Ccdc181	Gars	Stk19
Ccdc186	Gatad1	Stmn2
Ccdc71l	Gbp7	Stxbp6
Ccdc74a	Gins3	Sult1a1
Ccdc93	Gipc1	Syt7
Ccnd1	Gkap1	Tbcd
Ccne1	Glb1	Timp4
Ccnf	Glipr2	Tmem106b
Ccs	Gls	Tmem120a
Cd164	Gm10275	Tmem176b
Cd55	Gm14308	Tnfaip8
Cd99l2	Gm14410	Tomm70a
Cdadc1	Gm15440	Top1mt
Cdc16	Gm28437	Trh
Cdc23	Gm29216	Trim3
Cdc26	Gm4737	Trmt6
Cdc42ep1	Gm5069	Trnau1ap
Cdc5l	Gm9843	Trnp1
Cdh12	Gnb4	Trp53bp1
Cdh13	Gng13	Trpc4
Cdh22	Gpbp1	Tspan4
Cdk20	Gpd1l	Tspan7
Cdk2ap1	Gpr83	Tssc1
Cdk5	Gprin1	Ttc4
Cebpz	Gpsm2	Tyrobp
Cebpzos	Greb1	Uba6
Celf2	Gstm1	Ubxn6
Cenpt	Gstp1	Unc119
Cep68	Gtf2b	Urgcp
Cep70	Gtf2h1	Uxt
Chchd5	Gtf3a	Vip
Chd7	Gtf3c4	Vps4b
Chgb	Gtpbp8	Vtn
Chid1	Guk1	Wscd1
Chka	H2-Ab1	Zfand5
Chmp6	H2-K1	Zfp612
Chst8	Hdac6	Zfp637
Cib1	Hddc3	Zfp653
Cinp	Heg1	Zfp68
Ciz1	Hemk1	Zfr2
Clcn6	Herc4	Zkscan2
Clip1	Hes6	Zyx
Clip3	Hic1
Clk4	Higd2a
Clmp	Hnrnpdl
Clp1	Hnrnpu
Clpp	Hs2st1
Cltb	Id1
Clybl	Idh1
Cmbl	Idh3g
Cmss1	Ifi27l2a
Cmtm5	Ift46
Cnih3	Igf1
Cnnm3	Il18
Cnot6	Il6st
Cnpy3	Inafm1
Cog4	Inpp5a
Cog5	Insig2
Col1a2	Ints6l
Colec12	Ipo11
Commd2	Ireb2
Copg2	Itgax
Cops4	Itih5
Coq10a	Itpk1
Coq9	Itsn2
Cplx1	Jagn1
Cpne4	Kat5
Cpne6	Kcnj16
Cr1l	Kcnj3
Creb3l2	Kctd2
Crip2	Kdm6a
Crlf1	Klhdc10
Csnk1e	Klhdc4
Csrp1	Klhl25
Cstf1	Klhl8
Ctbp2	Kmt5c
Ctla2a	Kpna1
Ctnna1	Lama2
Ctsh	Lamtor5
Ctsl	Lars
Ctsz	Lbr
Cttn	Lcmt1
Cttnbp2nl	Ldah
Ctu1	Lgals1
Ctxn1	Lgi3
Ctxn2	Lhfpl2
Cul7	Lims2
Cwc25	Lonp1
Cyb561	Lpar1
Cyb5r1	Lrch3
Cyhr1	Lrrc73
Cyp2j6	Lrrn2
Daam1	Lrrtm3
Daam2	Lsm1
Dbi	Ltv1
Dbnl	Lyar
Dbp	Lynx1
Dcaf8	Lyz2
Dclk1	Madd
Dcn	Maea
Dctn1	Magi1
Dctn6	Maml2
Dcx	Map1b
Ddx1	Mapk1
Ddx54	Mapk10
Ddx56	Mapk14
Dgkd	Mast3
Dhfr	Mbd1
Diras2	Mbd3
Dkk3	Mboat2
Dnaja4	Mdn1
Dnajc27	Med12
Dnajc7	Med28
Dnajc9	Med4
Dner	Meis2
Dnttip1	Mesd
Dolpp1	Mettl26
Dph2	Mgll
Drg1	Mlc1
Dtnb	Mmgt1
Dus2	Morn2
Dus3l	Mpeg1
Dusp11	Mrpl12
Dym	Mrpl14
Dync2h1	Mrpl21
Dynll1	Mrpl35
Dzip3	Mrpl37
E2f6	Mrpl42
Ebna1bp2	Mrpl43
Edc3	Mrpl45
Edem2	Mrpl48
Eef1b2	Mrpl53
Efemp2	Mrps16
Eif1ad	Mrps27
Eif2b2	Mrps33
Eif2d	Mrps34
Eif3l	Mrps36
Eif4enif1	Mrvi1
Elovl1	Msl3
Elp5	Mybbp1a
Elp6	Naa10
Emc2	Naa60
Emcn	Ncald
Emg1	Nceh1
Endog	Ndrg2
Engase	Ndrg3
Enpp2	Ndufa10
Enpp6	Ndufs4
Epha5	Ndufv2
Ephx1	Neurl4
Epm2aip1	Nhej1
Epn2	Nol7
Ercc4	Notch1
Ercc8	Npc2
Ergic1	Npy
Ergic3	Nrsn1
Ermn	Nsd3
Ero1lb	Nsmf
Esam	Nsun2
Esd	Nsun5
Ethe1	Ntm
Etv4	Ntmt1
Evc	Nucb2
Exoc7	Nudc-ps1
Exosc1	Nudt1
Exosc4	Nudt11
Exosc9	Nup62
Ext1	Nxt1
Ezh2	Osbpl6
Faap100	Osmr
Fads1	P3h2
Fam107b	Pak1
Fam110b	Pak1ip1
Fam126a	Pald1
Fam129b	Palm
Fam163a	Pard3
Fam171a1	Parl
Fam174b	Pcbd1
Fam181b	Pcnx3
Fam193a	Pde4dip
Fam19a5	Pdf
Fam216a	Pdk2
Fam217b	Pdlim5
Fam222b	Pex11b
Fam229b	Pfn2
Fam234a	Pglyrp1
Fam234b	Pgp
Fam84a	Pgrmc2
Fbxl17	Phyh
Fbxo34	Pi4k2a
Fbxo4	Pigh
Fbxw9	Pik3r4
Fcer1g	Pisd
Fcf1	Pllp
Fcgrt	Plxna3
Fdx1l	Pml
Fem1c	Pon2
Fgf1	Pop5
Fgfr2	Porcn
Fiz1	Postn
Fkbp14	Ppp1cb
Fkbp15	Ppp1cc
Fkbp1b	Ppp1r13b
Fkbp8	Praf2
Fktn	Prdm15
Flna	Prdx6
Flywch2	Prelp
Fmnl3	Prkab2
Fndc1	Prkch
Foxs1	Prkcz
Frmpd1	Prkd3
Frzb	Prr18
Fundc1	Prr36
Fxyd5	Prr5l
Fyb	Prrc2c
Gaa	Psma4
Gab1	Psmb4
Gabarap	Psmb5
Gabrg2	Psmd3
Gabrg3	Ptch1
Gal	Ptges2
Galnt9	Ptov1
Gamt	Ptpdc1
Garem1	Ptpn23
Gcdh	Ptpn5
Gcsh	Ptprd
Gdpd5	Pus1
Gfap	Pus3
Ggnbp2	Pycard
Gja4	R3hcc1l
Gjc2	Rab13
Gjd2	Rab2a
Gla	Rabggta
Gle1	Rapgef3
Glrx	Rasa3
Glrx3	Rasa4
Gm10260	Rasgrf2
Gm10273	Rbbp7
Gm12191	Rbfox3
Gm12892	Rbm43
Gm13303	Rbmx2
Gm14391	Rbp1
Gm14776	Rdh14
Gm15387	Rdm1
Gm15446	Rere
Gm20716	Retsat
Gm20721	Rev1
Gm2564	Rims3
Gmds	Rit1
Gmfb	Rlbp1
Gmppb	Rnf114
Gnaz	Rnf220
Gng5	Rnh1
Gngt2	Rpain
Gnptg	Rpap1
Golga3	Rpl10-ps3
Golga4	Rplp0
Gon4l	Rps14
Gosr2	Rps6ka1
Gp1bb	Rps6kb1
Gpatch2	Rps6kl1
Gpld1	Rps9
Gpn1	Rpusd1
Gpr108	Rras2
Gpr137c	Rrp7a
Gpr155	Rsph10b
Gpr75	Rtn1
Gprc5c	Rtn4rl1
Gpsm1	S100a10
Gramd1a	S100a4
Grb2	Satb1
Gria2	Scnm1
Gria3	Sco2
Gria4	Sdc3
Grin2a	Sec22b
Grsf1	Sec63
Gsn	Sema3g
Gstk1	Serp2
Gtf3c5	Serpini1
Gtpbp4	Sertad1
Gtpbp6	Sh3bp5l
Gucy1a3	Shisa4
H2afv	Siae
Hat1	Siah2
Haus5	Sigirr
Hbegf	Sirpa
Hbp1	Sirt2
Hddc2	Slamf9
Heatr1	Slc1a5
Heatr6	Slc20a1
Hebp2	Slc25a19
Herpud1	Slc29a3
Hexim2	Slc35b4
Hibch	Slc38a3
Hif1an	Slc38a9
Hist1h2bc	Slc3a2
Hmgxb4	Slc4a3
Hnrnpa0	Slco2b1
Hpcal4	Smap1
Hs3st4	Smn1
Hs6st2	Snap29
Hsdl1	Snx16
Hsp90aa1	Snx19
Hspa8	Snx3
Hsph1	Sord
Iah1	Sparcl1
Idh2	Spata2l
Ifitm1	Spata7
Ifitm10	Spon1
Ift172	Sptlc2
Ift43	Sra1
Ift74	Srek1ip1
Igfbp6	Srgap3
Ighmbp2	Srrm4
Igsf3	Ssbp2
Igsf8	Ssna1
Ik	Ssu72
Ikbkap	St7
Il13ra1	St8sia3
Ildr2	Stk38
Impdh1	Stmn1
Inpp5k	Stoml1
Ints4	Supt4a
Ints5	Swap70
Ipcef1	Sympk
Ipo4	Syn2
Ipo5	Synm
Iqcb1	Syt17
Iqsec3	Tab1
Isyna1	Tacc2
Itih3	Taf10
Itm2c	Taf6l
Itpa	Tars2
Itpr1	Tbc1d2b
Itpr2	Tbc1d31
Jmjd6	Tbc1d5
Kank3	Tbcb
Kat7	Tcaf1
Kcnab1	Tcp1
Kcnab2	Tdrd3
Kcnc4	Tenm1
Kcnd1	Tesc
Kcnip4	Tfam
Kcnj10	Tfrc
Kcnj8	Th
Kcnmb4	Thrsp
Kdm2b	Thy1
Kdm4b	Tigar
Kdm7a	Timm44
Kif13a	Tm4sf1
Kif1b	Tmed3
Kif1bp	Tmem108
Kif21b	Tmem130
Kif5c	Tmem14c
Kifc3	Tmem175
Kiz	Tmem185a
Klf4	Tmem19
Klhl22	Tmem229b
Klhl40	Tmem230
Kmt2c	Tmem246
Lamc3	Tmem248
Lamp1	Tmem254c
Lamp5	Tmem38a
Larp4b	Tmem50b
Letm2	Tmem68
Lgals4	Tmem86a
Lgi1	Tmub1
Lias	Tmx4
Lime1	Tnfaip1
Lin7b	Tnk2
Litaf	Tomm34
Lmna	Tor3a
Lmo1	Tpd52
Lrig1	Tpd52l2
Lrig2	Tpm2
Lrp11	Tpp1
Lrrc14	Trak2
Lrrc57	Trim27
Lrsam1	Trmt61a
Lrtm2	Trpc4ap
Lsm6	Trub2
Lss	Tsen34
Ly6c1	Tspan33
Ly6e	Tsr1
Ly86	Ttll11
Mad1l1	Tuba4a
Mad2l1bp	Tuba8
Mag	U2af1l4
Maged2	Uba2
Maip1	Ubc
Mak16	Ube2j1
Map1lc3b	Ufm1
Map3k10	Unc13c
Map6d1	Unc45a
Map7d1	Vac14
Mapkapk2	Vapb
2020-03-11	Vim
2020-03-05	Vipr2
Mark1	Vps18
Mark3	Vps33a
Mast2	Vps36
Mat2b	Vps51
Mbd6	Vsig2
Mbnl1	Vwa1
Mchr1	Wbp1
Mcm7	Wdr45b
Mctp1	Wdr60
Mcur1	Wdr77
Mdm2	Whamm
Med11	Wnt7b
Med13l	Wsb2
Med17	Xpc
Med20	Xpr1
Med21	Xrcc1
Med22	Ythdf1
Med27	Ywhah
Mef2c	Zbtb48
Megf11	Zdhhc16
Meox1	Zdhhc2
Mepce	Zfand2b
Metap1	Zfp386
Metap1d	Zfp445
Mettl23	Zfp467
Mfge8	Zfp788
Mfsd2a	Zfp944
Mgat4a	Zfp954
Mief2	Zfp969
Miip	Zfyve19
Mindy2	Zswim7
Mki67	Zswim8
Mkl1
Mms19
Mob2
Mocs2
Mok
Mon2
Mpc1
Mpp2
Mpp5
Mpp6
Mpzl1
Mrpl50
Mrpl55
Mrps18a
Mrps18c
Mrps2
Mrps6
Mrrf
Mrs2
Ms4a15
Mt1
Mtap
Mtfp1
Mtfr1
Mtg1
Mthfr
Mtmr3
Mtmr7
Mtss1l
Mtus1
Mvd
N4bp1
Naa35
Nampt
Nap1l4
Nat9
Nbl1
Nckipsd
Ndn
Ndnf
Ndrg1
Ndufa11
Ndufaf1
Ndufb3
Ndufv3
Nectin2
Nelfcd
Nelfe
Nemp2
Nes
Nf1
Nhlrc1
Nip7
Nkd1
Nktr
Nme5
Nmi
Nnat
Nolc1
Nop14
Nop2
Nos1
Nostrin
Notch3
Npepl1
Nqo2
Nr1h3
Nrcam
Nrxn1
Nsd2
Nsdhl
Nsmce4a
Nsrp1
Ntsr2
Nub1
Nucb1
Nudt16
Nudt4
Nup50
Nupr1
Nxn
Nxph1
Oat
Oaz1
Olfml3
Olig1
Olig2
Oplah
Ormdl1
Oscp1
Otop2
Oxsr1
P4ha2
Pacsin3
Paip2
Pard6g
Parm1
Parp10
Parp6
Pcdh9
Pced1a
Pcsk1
Pcx
Pdcd5
Pde1a
Pde1c
Pde2a
Pde4a
Pdlim2
Pdlim4
Pdpn
Pdss1
Pdzd11
Pepd
Pes1
Pgap1
Pgf
Pgk1
Pgls
Phc2
Phf24
Phf6
Phka2
Phkg2
Phldb2
Phtf1
Pias2
Picalm
Pigk
Pigq
Pigs
Pik3c3
Pin1
Pitpnm1
Pla1a
Pla2g16
Plac9a
Plbd2
Plcb1
Plcl2
Pld3
Plekhb2
Plekhf1
Plekhg3
Plscr3
Pltp
Plxdc1
Plxdc2
Pmel
Pnlip
Pofut1
Pold1
Polr2c
Polr2g
Polr3b
Polr3f
Polr3k
Pomp
Ppard
Ppig
Ppil4
Ppm1k
Ppp1r16a
Ppp1r3c
Ppp1r9a
Ppp2r1a
Ppp2r2a
Prdm16
Prkca
Prkcb
Prkra
Prkrip1
Prmt2
Proca1
Prrc2b
Prss12
Psat1
Psip1
Psma1
Psmb10
Psmc3ip
Psme2
Ptcd2
Ptk2b
Ptp4a1
Ptpn2
Ptpn21
Ptprb
Ptrh2
Pttg1
Pus7
Pusl1
Pvalb
Pvr
Pwwp2b
Rab2b
Rab35
Rab3gap2
Rab3ip
Rab40c
Rab42
Rab6b
Rad23a
Rad52
Rad9b
Ranbp3
Rangap1
Rap1b
Rasa1
Rasip1
Raver2
Rbfa
Rbm17
Rbm33
Rbm4
Rbm5
Rbp4
Rbsn
Rcan1
Rce1
Rchy1
Rcor3
Rd3l
Rdh5
Rdx
Reep1
Rela
Reln
Rer1
Rfc1
Rftn2
Rfxap
Rgcc
Rgmb
Rgs11
Rgs4
Rhcg
Rhof
Rhou
Rilpl1
Rimkla
Rit2
Rmnd5a
Rnf185
Rnf214
Rnf26
Rnf6
Rnpepl1
Rogdi
Rpf2
Rph3a
Rpl30-ps9
Rpl7a
Rps11
Rps19bp1
Rps6ka4
Rps8
Rras
Rrp1
Rsl1d1
Rsph9
Rtel1
Rtkn
Rtn4ip1
Rufy1
Ruvbl1
S100a6
S1pr3
Sap18b
Sap25
Sars2
Scap
Scg2
Scg5
Scn3b
Scn5a
Scrn2
Sdhb
Sec11c
Sec22a
Sec24c
Sec31a
Sec61a1
Selenbp1
Selenos
Sema5b
Senp2
Senp6
Sept2
Serpinb1a
Serpinf1
Serping1
Setd5
Setdb1
Sf3b1
Sf3b3
Sgsm3
Sh2b3
Sh2d3c
Sh3bgrl2
Shisa5
Sidt1
Sipa1l1
Sirt7
Siva1
Skap1
Skiv2l2
Skp1a
Slc12a2
Slc15a4
Slc17a7
Slc1a3
Slc25a1
Slc25a29
Slc25a3
Slc27a1
Slc29a4
Slc2a6
Slc35b1
Slc35e3
Slc35f6
Slc39a11
Slc39a7
Slc4a1ap
Slc6a13
Slc6a20a
Slc6a3
Slc6a8
Slc7a6
Slc9a3r2
Slc9a6
Slc9a9
Sltm
Smad5
Smarca4
Smc1a
Smim10l2a
Smim13
Smim19
Smpdl3a
Smtn
Smu1
Smyd3
Smyd5
Snap47
Snap91
Snapc2
Snapc5
Snf8
Snhg11
Snn
Snrnp27
Snrpd1
Snrpd3
Snx12
Snx33
Sort1
Sox11
Sox8
Spa17
Specc1
Speg
Sphkap
Spp1
Sprn
Sqle
Srd5a3
Srgap2
Srp19
Srp54a
Srp54b
Srp68
Srpk3
Srr
Srsf10
Ssr4
Sst
St13
St3gal3
Stab1
Star
Stard10
Stard3
Stard3nl
Stk11
Strip1
Strn4
Stx3
Sub1
Sucla2
Supt3
Surf1
Surf2
Sv2a
Svbp
Syde1
Syngr2
Syngr3
Synj1
Synj2
Synpr
Syt5
Tac2
Tacc3
Tada1
Taf1c
Tagap1
Taok1
Tbc1d1
Tbc1d20
Tbc1d24
Tbc1d4
Tbxa2r
Tcea2
Tceal9
Tcta
Tctn3
Tdrp
Ten1
Tex10
Tex264
Tfip11
Tfpi
Tgm2
Thap11
Thoc1
Thoc2
Thoc3
Thtpa
Tia1
Tigd2
Timm10
Timm17a
Timm22
Timm23
Timm29
Timm8a1
Tlcd1
Tle2
Tm2d2
Tm2d3
Tm9sf3
Tmed1
Tmem109
Tmem119
Tmem125
Tmem141
Tmem147
Tmem167
Tmem176a
Tmem192
Tmem205
Tmem218
Tmem25
Tmem260
Tmem43
Tmem63a
Tmem8
Tmod1
Tmsb4x
Tmx2
Tnfaip8l1
Tnfrsf1a
Tnni3
Tns3
Tnxb
Top2b
Tppp3
Tpr
Tpst1
Trappc4
Trappc6b
Trappc9
Triap1
Trim11
Trim44
Trim45
Trim47
Trim56
Trir
Trmt2a
Trmt5
Trmu
Tsc2
Tsn
Tspan17
Ttc39c
Ttl
Ttll7
Ttpal
Tubb3
Tubb6
Tubg1
Tufm
Twnk
Txndc9
Txnrd2
Tyro3
Uap1l1
Uba3
Ubac2
Ubap1
Ubash3b
Ubb
Ube2d-ps
Ube2f
Ube2ql1
Ube2z
Ube3b
Ubp1
Uchl1
Ugp2
Uhrf1bp1
Upf3a
Uqcrb
Usp13
Usp19
Usp4
Usp48
Usp6nl
Vcan
Vcl
Vgll4
Vps53
Vrk3
Vstm4
Vta1
Vti1b
Vwf
Wapl
Wdr18
Wdr24
Wdr45
Wdr5
Wdr73
Wnk4
Wrap73
Wwp1
Wwp2
Xab2
Xndc1
Xpo7
Xrcc3
Xrcc5
Xrn2
Yaf2
Yipf3
Ykt6
Ywhaq
Zc3h15
Zcchc17
Zcchc24
Zfand2a
Zfp1
Zfp14
Zfp174
Zfp2
Zfp260
Zfp280b
Zfp30
Zfp318
Zfp335
Zfp35
Zfp354a
Zfp512
Zfp536
Zfp560
Zfp623
Zfp629
Zfp692
Zfp704
Zfp90
Zfp932
Zfr
Zgpat
Zhx3
Zkscan17
Zmat4
Zmiz2
Zmym3
Znhit6
Znrd1
Zpr1
Zscan21
