# Supplementary material for: Premalignant Oligodendrocyte Precursor Cells Stall in a Heterogeneous State of Replication Stress Prior to Gliomagenesis
Source: Oxford University Press journal article supplement (doi:10.1158/0008-5472.can-20-1037), 2021-02-02
Supplement: 00085472can201037-sup-240357_3_supp_6873594_qnkplt.xlsx [file 00085472can201037-sup-240357_3_supp_6873594_qnkplt.xlsx]

## Sheet: bulk150-up
label	pval	fdr	gset.size	genes.overlap	hits
HALLMARK_E2F_TARGETS	4.5e-56	2.3e-54	200	121	Ak2,Asf1b,Atad2,Aurka,Aurkb,Bard1,Birc5,Brca1,Brca2,Bub1b,Cbx5,Ccnb2,Ccne1,Cdc20,Cdc25a,Cdc25b,Cdca3,Cdca8,Cdk1,Cdk4,Cdkn1b,Cdkn2a,Cdkn2c,Cdkn3,Cenpe,Cenpm,Chek1,Chek2,Cks1b,Cks2,Cnot9,Ctps,Dclre1b,Dctpp1,Dek,Depdc1a,Diaph3,Dlgap5,Dscc1,Dut,E2f8,Eed,Espl1,Exosc8,Ezh2,Gins1,H2afx,H2afz,Hells,Hmga1,Hmgb2,Hmmr,Hus1,Kif18b,Kif22,Kif2c,Kif4,Lbr,Lig1,Lmnb1,Lyar,Mad2l1,Mcm2,Mcm3,Mcm4,Mcm5,Mcm6,Mcm7,Melk…
HALLMARK_INTERFERON_GAMMA_RESPONSE	1.9e-52	4.8e-51	208	120	Arid5b,B2m,Batf2,Bst2,Casp1,Casp3,Casp4,Casp7,Casp8,Ccl12,Ccl5,Ccl7,Cd274,Cd38,Cd69,Cd74,Cd86,Cfb,Ciita,Cmklr1,Csf2rb2,Cxcl10,Ddx58,Ddx60,Dhx58,Eif2ak2,Epsti1,Fcgr1,Fgl2,Gbp3,Gbp9,Helz2,Herc6,H2-D1,H2-Q1,H2-Q10,H2-Q7,H2-M3,H2-Q6,H2-T23,H2-DMa,H2-Aa,H2-Eb1,Icam1,Ifi27,Ifi30,Ifi35,Ifi44,Ifih1,Ifit2,Ifit3,Ifitm2,Ifitm3,Ifnar2,Il10ra,Il18bp,Il2rb,Il4ra,Irf1,Irf5,Irf7,Irf8,Irf9,Isg15,Isg20,Lap3,Lats2,…
HALLMARK_G2M_CHECKPOINT	8.1e-44	1.3e-42	199	108	Aurka,Aurkb,Bard1,Bcl3,Birc5,Brca2,Bub1,Bub3,Ccna2,Ccnb2,Ccnd1,Ccnf,Cdc20,Cdc25a,Cdc25b,Cdc45,Cdc6,Cdk1,Cdk4,Cdkn1b,Cdkn2c,Cdkn3,Cenpa,Cenpe,Cenpf,Chaf1a,Chek1,Cks1b,Cks2,Dbf4,Dkc1,Dtymk,E2f2,E2f3,Egf,Espl1,Exo1,Ezh2,Fbxo5,G3bp1,Gins2,H2afv,H2afx,H2afz,Hmga1,Hmgn2,Hmmr,Hus1,Kif11,Kif15,Kif20b,Kif22,Kif23,Kif2c,Kif4,Kmt5a,Knl1,Kpnb1,Lbr,Lig3,Lmnb1,Mad2l1,Mcm2,Mcm3,Mcm5,Mcm6,Mki67,Mt2,Mybl2,Myc,Nas…
HALLMARK_INTERFERON_ALPHA_RESPONSE	7.5e-35	9.4e-34	102	67	B2m,Batf2,Bst2,Casp1,Casp8,Cd74,Csf1,Cxcl10,Ddx60,Dhx58,Eif2ak2,Elf1,Epsti1,Gbp2,Gbp3,Helz2,Herc6,H2-D1,H2-M3,H2-Q10,H2-Q7,H2-T23,Ifi27,Ifi30,Ifi35,Ifi44,Ifih1,Ifit2,Ifit3,Ifitm2,Ifitm3,Il4ra,Irf1,Irf7,Irf9,Isg15,Isg20,Lap3,Lgals3bp,Ly6e,Mov10,Nmi,Oasl1,Ogfr,Parp12,Parp14,Parp9,Plscr1,Psmb8,Psmb9,Psme1,Ripk2,Rsad2,Rtp4,Samd9l,Sp110,Stat2,Tap1,Tdrd7,Tmem140,Trim14,Trim21,Trim25,Txnip,Uba7,Ube2l6,U…
HALLMARK_ALLOGRAFT_REJECTION	1.2e-31	1.2e-30	204	95	B2m,Bcl3,Brca1,C2,Capg,Ccl7,Ccl12,Ccl4,Ccl5,Ccnd2,Ccnd3,Ccr2,Cd3e,Cd4,Cd74,Cd86,Cd8a,Cdkn2a,Csf1,Ctss,Cxcl13,Dars,Degs1,Egfr,Eif3d,Eif3j1,Eif5a,Elf4,Ets1,F2r,Fcgr2b,Fgr,Flna,Fyb,Galnt1,Gbp2,Gpr65,Hcls1,H2-D1,H2-Q1,H2-Q10,H2-Q7,H2-DMa,H2-DMb2,H2-Aa,H2-T23,H2-M3,Icam1,Icosl,Ifnar2,Ifngr1,Ifngr2,Igsf6,Il16,Il18rap,Il1b,Il2rb,Il2rg,Il4ra,Inhbb,Irf7,Irf8,Itgal,Itgb2,Lcp2,Lif,Ly75,Ly86,Lyn,Map3k7,Map4k…
HALLMARK_EPITHELIAL_MESENCHYMAL_TRANSITION	3.5e-27	2.9e-26	200	88	Adam12,Bgn,Cald1,Calu,Capg,Cd44,Cdh6,Col11a1,Col16a1,Col4a1,Col5a3,Colgalt1,Crlf1,Cxcl1,Cxcl5,Dab2,Dcn,Dpysl3,Dst,Eln,Fbln1,Fbln2,Fbln5,Fbn1,Fermt2,Fgf2,Flna,Foxc2,Fuca1,Gadd45a,Gas1,Glipr1,Gpc1,Gpx7,Igfbp2,Igfbp3,Igfbp4,Itga2,Itga5,Itgb1,Itgb3,Lama1,Lamc1,Lgals1,Lox,Loxl1,Lum,Mcm7,Mgp,Mmp14,Mmp2,Msx1,Nid2,P3h1,Pcolce2,Pdlim4,Plaur,Plod1,Plod3,Pmp22,Postn,Prrx1,Ptx3,Pvr,Qsox1,Sat1,Sdc1,Sdc4,Serpi…
HALLMARK_MYC_TARGETS_V1	2.5e-20	1.8e-19	200	78	Aimp2,Apex1,Bub3,Cad,Ccna2,Cct3,Cct5,Cdc20,Cdc45,Cdk2,Cdk4,Cops5,Ctps,Ddx18,Ddx21,Dek,Dut,Eef1b2,Eif3b,Eif3d,Eif3j1,Eif4a1,Eprs,Fbl,G3bp1,Gnl3,H2afz,Hddc2,Hdgf,Hnrnpa1,Iars,Kars,Kpnb1,Ldha,Lsm2,Mad2l1,Mcm2,Mcm4,Mcm5,Mcm6,Mcm7,Myc,Nhp2,Nop16,Odc1,Pabpc1,Pabpc4,Pcna,Phb,Phb2,Pold2,Pole3,Prdx4,Prpf31,Psmb2,Psmb3,Psmd1,Psmd3,Pwp1,Rack1,Rfc4,Rpl18,Rpl22,Rpl6,Rplp0,Rps2,Rps3,Rps6,Rrm1,Rsl1d1,Ruvbl2,Sf3…
HALLMARK_INFLAMMATORY_RESPONSE	3.2e-19	2e-18	199	76	Abca1,Adgre1,Ahr,Aplnr,Aqp9,Axl,Bst2,C3ar1,Ccl12,Ccl5,Ccl7,Cd14,Cd69,Clec5a,Cmklr1,Csf1,Csf3r,Cxcl10,Cxcl5,Cybb,Eif2ak2,Has2,Hbegf,Icam1,Icosl,Ifngr2,Il10ra,Il18rap,Il1a,Il1b,Il1r1,Il2rb,Il4ra,Irf1,Irf7,Itga5,Itgb3,Kif1b,Klf6,Lcp2,Lif,Ly6e,Lyn,Mmp14,Msr1,Myc,Nfkb1,Nmi,Nod2,Osmr,P2rx4,P2rx7,P2ry2,Pdpn,Plaur,Ptafr,Ptpre,Pvr,Rela,Rgs1,Rgs16,Rhog,Ripk2,Rnf144b,Rtp4,Slc31a1,Slc7a1,Slc7a2,Tapbp,Timp1,T…
HALLMARK_KRAS_SIGNALING_UP	4.3e-19	2.4e-18	204	77	Adam17,Akap12,Akt2,Aldh1a3,Ammecr1,Angptl4,C3ar1,Ccnd2,Cd37,Cfb,Clec4a3,Cmklr1,Crot,Csf2ra,Ctss,Cxcl10,Cxcr4,Dnmbp,Dock2,Dusp6,Emp1,Ephb2,Ets1,Etv4,Etv5,Evi5,Fcer1g,Flt4,Fuca1,G0s2,Galnt3,Gpnmb,Gypc,Hbegf,Hist1h2bb,Igfbp3,Ikzf1,Il10ra,Il1b,Il2rg,Irf8,Itga2,Itgb2,Laptm5,Lat2,Lcp1,Lif,Mafb,Map4k1,Mmp11,Mtmr10,Nrp1,Plat,Plau,Plaur,Prkg2,Prrx1,Psmb8,Rgs16,Satb1,Sema3b,Serpina3n,Slpi,Sox9,Spon1,Spry2,…
HALLMARK_IL2_STAT5_SIGNALING	7.7e-18	3.8e-17	200	74	Adam19,Ahr,Alcam,Anxa4,Bcl2,Capg,Capn3,Casp3,Ccnd2,Ccnd3,Ccne1,Cd44,Cd81,Cd83,Cd86,Cdc6,Cdkn1c,Ckap4,Csf1,Cst7,Ctsz,Cxcl10,Dennd5a,Dhrs3,Emp1,Eno3,Enpp1,Etv4,Fgl2,Galm,Gbp3,Glipr2,Gpr65,Hipk2,Hk2,Ifitm3,Ifngr1,Il10ra,Il2rb,Il4ra,Irf8,Itgae,Itih5,Klf6,Lif,Lrig1,Lrrc8c,Mapkapk2,Myc,Myo1c,Nfkbiz,Nop2,Nrp1,Odc1,P2rx4,Plin2,Plscr1,Pus1,Rgs16,Rhoh,Rnh1,S100a1,Slc1a5,Smpdl3a,Snx9,Spry4,Swap70,Syngr2,Tgm…
HALLMARK_TNFA_SIGNALING_VIA_NFKB	3e-17	1.4e-16	200	73	Abca1,B4galt1,Bcl2a1a,Bcl3,Btg3,Ccl12,Ccl4,Ccl5,Ccnd1,Cd44,Cd69,Cd83,Cebpb,Cebpd,Cflar,Clcf1,Csf1,Cxcl1,Cxcl10,Cxcl5,Ddx58,Dennd5a,Dusp2,Efna1,Ehd1,Ets2,Fut4,G0s2,Gadd45a,Hbegf,Icam1,Icosl,Ier3,Ifih1,Ifit2,Ifngr2,Il1a,Il1b,Il6st,Irf1,Klf6,Lif,Litaf,Map2k3,Myc,Nfkb1,Nfkb2,Pdlim5,Pfkfb3,Plau,Plaur,Plek,Ptpre,Ptx3,Rela,Relb,Ripk2,Sat1,Sdc4,Socs3,Spsb1,Stat5a,Tap1,Tgif1,Tlr2,Tnc,Tnfaip2,Tnfaip6,Tnfai…
HALLMARK_MITOTIC_SPINDLE	1.6e-14	6.8e-14	199	68	Akap13,Arhgdia,Aurka,Bcar1,Birc5,Brca2,Bub1,Capzb,Ccnb2,Cdc42ep1,Cdc42ep4,Cdk1,Cdk5rap2,Cenpe,Cenpf,Cenpj,Cep192,Clip2,Cntrl,Dlgap5,Dock2,Dst,Ect2,Epb41,Epb41l2,Espl1,Ezr,Fbxo5,Flna,Flnb,Kif11,Kif15,Kif1b,Kif20b,Kif22,Kif23,Kif2c,Kif4,Kntc1,Llgl1,Lmnb1,Mapre1,Mark4,Mid1,Nedd9,Nek2,Net1,Nusap1,Palld,Pdlim5,Pif1,Plekhg2,Plk1,Prc1,Prex1,Pxn,Rab3gap1,Racgap1,Rfc1,Sass6,Sept9,Smc4,Top2a,Tpx2,Trio,Ttk,…
HALLMARK_P53_PATHWAY	2.2e-14	8.3e-14	200	68	Abhd4,Aen,Bak1,Casp1,Ccnd2,Ccnd3,Cd81,Cdh13,Cdkn2a,Cdkn2b,Cebpa,Ctsd,F2r,Fuca1,Gadd45a,Gm2a,Hbegf,Hmox1,Ier3,Ifi30,Il1a,Inhbb,Klk8,Lif,Lrmp,Notch1,Nupr1,Pcna,Pidd1,Plxnb2,Pom121,Prkab1,Ptpre,Rack1,Retsat,Rgs16,Rhbdf2,Rpl18,Rpl36,Rps27l,Rrad,Rxra,S100a4,Sat1,Sdc1,Sec61a1,Sfn,Slc35d1,Slc3a2,Slc7a11,Stom,Tap1,Tax1bp3,Tcn2,Tgfa,Tgfb1,Tm7sf3,Tnfsf9,Trp53,Trp63,Traf4,Txnip,Upp1,Vamp8,Vdr,Vwa5a,Zfp36l1,…
HALLMARK_APOPTOSIS	1e-13	3.4e-13	161	58	Anxa1,Bgn,Bid,Bmf,Brca1,Btg3,Casp1,Casp3,Casp4,Casp7,Casp8,Ccnd1,Ccnd2,Cd14,Cd38,Cd44,Cd69,Cdc25b,Cdk2,Cdkn1b,Cflar,Cth,Dap,Dcn,Diablo,Emp1,Erbb3,F2r,Gadd45a,Gpx3,Gsr,Gucy2e,H1f0,Hmgb2,Hmox1,Ier3,Ifitm3,Ifngr1,Il1a,Il1b,Irf1,Isg20,Lum,Mmp2,Nedd9,Plat,Rara,Rela,Retsat,Sat1,Satb1,Tap1,Timp1,Timp3,Tnfrsf12a,Top2a,Tspo,Txnip
HALLMARK_IL6_JAK_STAT3_SIGNALING	1e-13	3.4e-13	88	40	A2m,Bak1,Ccl7,Cd14,Cd36,Cd38,Cd44,Cd9,Csf1,Csf2ra,Csf2rb2,Csf3r,Cxcl1,Cxcl10,Cxcl13,Hmox1,Ifngr1,Ifngr2,Il17ra,Il1b,Il1r1,Il2rg,Il4ra,Il6st,Irf1,Irf9,Itgb3,Ltbr,Osmr,Pdgfc,Socs3,Stat1,Stat2,Stat3,Tgfb1,Tlr2,Tnfrsf12a,Tnfrsf1a,Tnfrsf1b,Tnfrsf21
HALLMARK_MTORC1_SIGNALING	8.5e-13	2.7e-12	200	65	Acaca,Ak4,Aurka,Bub1,Calr,Ccnf,Cd9,Cdc25a,Cops5,Coro1a,Cth,Ctsc,Cxcr4,Cyp51,Dhfr,Edem1,Elovl6,Eno1,Eprs,Fads2,Fgl2,G6pdx,Gla,Gsr,Hk2,Idh1,Ifi30,Igfbp5,Itgb2,Ldha,Lgmn,Map2k3,Mcm2,Mcm4,Me1,Mthfd2,Fam129a,Nup205,Nupr1,Pgm1,Phgdh,Pitpnb,Plk1,Prdx1,Psat1,Psph,Rpa1,Rrm2,Sec11a,Serp1,Shmt2,Skap2,Sla,Slc1a4,Slc1a5,Slc7a11,Slc7a5,Slc9a3r1,Sqle,Srd5a1,Tes,Tmem97,Txnrd1,Ung,Ykt6
HALLMARK_MYC_TARGETS_V2	1.3e-11	3.8e-11	58	29	Aimp2,Cdk4,Dctpp1,Ddx18,Dusp2,Farsa,Gnl3,Grwd1,Hk2,Ipo4,Mcm4,Mcm5,Mphosph10,Mrto4,Mybbp1a,Myc,Noc4l,Nop16,Nop2,Pes1,Phb,Plk1,Plk4,Ppan,Prmt3,Pus1,Srm,Tmem97,Ung
HALLMARK_COMPLEMENT	4.2e-11	1.2e-10	197	61	Anxa5,Apobec3,C1qa,C1qc,C2,C3,Casp1,Casp3,Casp4,Casp7,Ccl5,Cd36,Cdh13,Cebpb,Cfb,Cp,Cpm,Cpq,Ctsb,Ctsc,Ctsd,Ctsh,Ctss,Cxcl1,Dock9,Dusp6,Ehd1,Fcer1g,Gnai2,Gnb4,Irf1,Irf7,Itgam,Kcnip3,Lamp2,Lap3,Lcp2,Lgmn,Lipa,Lyn,Me1,Mmp14,Mmp15,Pfn1,Phex,Pik3cg,Plat,Plaur,Plek,Plscr1,Prcp,Prep,Prkcd,Psmb9,Rhog,S100a13,Serping1,Src,Timp1,Usp8,Was
HALLMARK_HYPOXIA	1e-10	2.8e-10	201	61	Ak4,Akap12,Aldoc,Angptl4,Anxa2,Atp7a,Bcan,Bcl2,Bgn,Cdkn1b,Cdkn1c,Chst3,Cp,Csrp2,Cxcr4,Dcn,Efna1,Egfr,Eno1,Eno3,Ets1,Ext1,Gpc1,Gys1,Hexa,Hk2,Hmox1,Ier3,Igfbp3,Isg20,Kdelr3,Kdm3a,Klf6,Ldha,Lox,Lxn,Mt2,Ncan,Noct,Pam,Pfkfb3,Pgm1,Plaur,Plin2,Rbpj,S100a4,Scarb1,Sdc2,Sdc3,Sdc4,Selenbp1,Slc25a1,Srpx,Stc2,Tes,Tgfbi,Tgm2,Tktl1,Tpd52,Ugp2,Zfp36
HALLMARK_GLYCOLYSIS	7.2e-10	1.8e-09	200	59	Agl,Agrn,Ak4,Akr1a1,Aldh7a1,Angptl4,Aurka,B3gat1,B4galt1,Capn5,Cd44,Cdk1,Cenpa,Cth,Cxcr4,Dcn,Depdc1a,Egfr,Eno1,Ext1,G6pdx,Gal3st1,Gfpt1,Gpc1,Gusb,Gys1,Hk2,Hmmr,Hs2st1,Idh1,Idua,Ier3,Igfbp3,Isg20,Kdelr3,Kif20a,Ldha,Lhpp,Me1,Nasp,Pam,Pgls,Plod1,Qsox1,Sdc1,Sdc2,Sdc3,Slc25a13,Slc35a3,Sox9,Srd5a3,Stc2,Taldo1,Tgfa,Tgfbi,Tktl1,Txn1,Ugp2,Vcan
HALLMARK_ESTROGEN_RESPONSE_LATE	2.5e-09	6e-09	206	59	Abhd2,Aff1,Ascl1,Bag1,Bcl2,Btg3,Ccnd1,Cd44,Cd9,Cdc20,Cdc6,Cyp26b1,Dlg5,Dusp2,Dynlt3,Etfb,Fabp5,Fam102a,Fgfr3,Flnb,Gal,Gins2,Gla,Hr,Hspb8,Igfbp4,Il6st,Impa2,Isg20,Kif20a,Mdk,Mocs2,Myb,Nbl1,Opn3,Pdlim3,Plk4,Plxnb1,Ptpn6,Rab31,Rbbp8,Ret,Scarb1,Sema3b,Serpina3n,Sfn,Slc16a1,Slc1a4,Slc26a2,Slc29a1,Slc7a5,Slc9a3r1,Sox3,Stil,Top2a,Tspan13,Tst,Ugdh,Zfp36
HALLMARK_ANDROGEN_RESPONSE	8.9e-09	2e-08	111	38	Abcc4,Abhd2,Adamts1,Akap12,Aldh1a3,Arid5b,B2m,B4galt1,Bmpr1b,Ccnd1,Ccnd3,Cdc14b,Cdk6,Cenpn,Dbi,Elk4,Gsr,H1f0,Hpgd,Iqgap2,Lifr,Myl12a,Nkx3-1,Pdlim5,Ptpn21,Rps6ka3,Sat1,Sec24d,Slc26a2,Slc38a2,Spcs3,Steap4,Tnfaip8,Tpd52,Ube2i,Xrcc5,Zbtb10,Zmiz1
HALLMARK_APICAL_JUNCTION	1.3e-08	2.7e-08	199	56	Actb,Adam23,Akt2,B4galt1,Cd274,Cd276,Cd86,Cdh3,Cdh6,Cdk8,Cntn1,Col16a1,Col9a1,Ctnna1,Ctnnd1,Egfr,Epb41l2,Fbn1,Flnc,Fyb,Gamt,Gnai2,Hadh,Icam1,Inppl1,Irs1,Itga2,Itga9,Itgb1,Lima1,Mdk,Mmp2,Mpzl1,Msn,Nectin2,Nexn,Nf2,Nlgn3,Pfn1,Ptprc,Rac2,Rras,Rsu1,Sdc3,Shc1,Skap2,Slit2,Src,Syk,Tgfbi,Tjp1,Tspan4,Vasp,Vcam1,Vcan,Wnk4
HALLMARK_ESTROGEN_RESPONSE_EARLY	1.5e-08	3.2e-08	200	56	Abhd2,Aff1,B4galt1,Bag1,Bcl2,Ccnd1,Cd44,Cyp26b1,Dhrs3,Dynlt3,Elf1,Fam102a,Fasn,Flnb,Gab2,Gfra1,Gla,Hr,Hspb8,Igfbp4,Il6st,Inhbb,Isg20l2,Lrig1,Mindy1,Mlph,Myb,Mybbp1a,Mybl1,Myc,Nbl1,Olfml3,Opn3,P2ry2,Pdlim3,Rab31,Rara,Rbbp8,Ret,Rhobtb3,Scarb1,Sema3b,Sfn,Slc16a1,Slc1a4,Slc26a2,Slc7a2,Slc7a5,Slc9a3r1,Sox3,Stc2,Svil,Tgif2,Tgm2,Tmem164,Tsku
HALLMARK_UV_RESPONSE_UP	6.5e-08	1.3e-07	162	47	Bak1,Bid,Btg3,Casp3,Ccnd3,Ccne1,Cdk2,Cdkn1c,Cdkn2b,Cebpg,Col2a1,Creg1,Cxcl1,Cyb5r1,Ddx21,Gal,Ggh,Gpx3,H2afx,H2-T23,H2-D1,H2-M3,H2-Q10,H2-Q7,Hmox1,Hyal2,Icam1,Igfbp2,Il6st,Irf1,Lyn,Mmp14,Msx1,Nat2,Pdlim3,Pole3,Ppat,Prkcd,Ret,Rfc4,Rrad,Shox2,Sigmar1,Tap1,Tmbim6,Tst,Ykt6
HALLMARK_COAGULATION	1.4e-07	2.7e-07	141	42	A2m,Anxa1,C1qa,C2,C3,Capn5,Cd9,Cfb,Cfi,Cpq,Ctsb,Ctse,Ctsh,Dusp6,F9,Fbn1,Gng12,Itga2,Itgb3,Klk8,Lamp2,Lgmn,Mmp11,Mmp14,Mmp15,Mmp2,P2ry1,Plat,Plau,Plek,Prep,Pros1,Rapgef3,S100a1,S100a13,Serping1,Sh2b2,Sirt2,Sparc,Thbs1,Timp1,Timp3
HALLMARK_ADIPOGENESIS	2.6e-07	4.8e-07	200	53	Abca1,Acadl,Acadm,Acads,Ak2,Angpt1,Angptl4,Apoe,C3,Cat,Cd151,Cd302,Cd36,Cdkn2c,Col4a1,Cpt2,Dbt,Decr1,Dram2,Elovl6,Esyt1,Etfb,Gadd45a,Gpam,Gpx3,Hadh,Hspb8,Idh1,Ifngr1,Itga7,Itih5,Lama4,Lifr,Lpcat3,Marc2,Me1,Pfkfb3,Pgm1,Plin2,Ppp1r15b,Reep6,Retsat,Scarb1,Slc1a5,Slc25a1,Sowahc,Sspn,Stat5a,Stom,Taldo1,Tkt,Tst,Ucp2
HALLMARK_UNFOLDED_PROTEIN_RESPONSE	5.5e-07	9.7e-07	113	35	Aldh18a1,Bag3,Calr,Ccl12,Cebpb,Cebpg,Cks1b,Dkc1,Edem1,Eif4a1,Eif4a3,Eif4ebp1,Fkbp14,Gosr2,H2afx,Iars,Kdelr3,Lsm4,Mthfd2,Nfya,Nhp2,Nop14,Pdia6,Psat1,Sdad1,Sec11a,Sec31a,Serp1,Shc1,Slc1a4,Slc7a5,Spcs3,Stc2,Wipi1,Yif1a
HALLMARK_XENOBIOTIC_METABOLISM	8.8e-07	1.5e-06	202	52	Abcc2,Abcc3,Adh5,Aox1,Ap4b1,Apoe,Aqp9,Asl,Atoh8,Bcar1,Cat,Cd36,Cfb,Crot,Csad,Cyp2j9,Ddah2,Esr1,Etfdh,Ets2,Fbln1,Gart,Gsr,Hes6,Hmox1,Idh1,Igf1,Igfbp4,Il1r1,Irf8,Kars,Lcat,Mt2,Pdlim5,Pgd,Pros1,Psmb10,Ptgr1,Pycr1,Rap1gap,Retsat,Shmt2,Slc12a4,Slc1a5,Slc35d1,Ssr3,Tmbim6,Tmem176b,Tmem97,Tnfrsf1a,Ugdh,Upp1
HALLMARK_FATTY_ACID_METABOLISM	1.3e-05	2.2e-05	160	41	Acadl,Acadm,Acads,Acsm3,Acss1,Aldh1a1,Apex1,Bmpr1b,Car6,Cd36,Cpt1a,Cpt2,Cryz,Decr1,Eci2,Eno3,Etfdh,Fasn,G0s2,H2afz,Hadh,Hadhb,Hpgd,Hsd17b10,Hsdl2,Idh1,Kmt5a,Ldha,Lgals1,Me1,Metap1,Odc1,Ostc,Pcbd1,Prdx6,Psme1,Reep6,Retsat,Suclg2,Ube2l6,Ugdh
HALLMARK_TGF_BETA_SIGNALING	2.9e-05	4.6e-05	54	19	Bmpr1a,Cdkn1c,Fnta,Hdac1,Hipk2,Id3,Ifngr2,Map3k7,Rab31,Rhoa,Smad1,Smurf1,Smurf2,Tgfb1,Tgfbr1,Tgif1,Thbs1,Tjp1,Wwtr1
HALLMARK_PI3K_AKT_MTOR_SIGNALING	0.00014	0.00022	105	28	Acaca,Akt1s1,Arhgdia,Calr,Cdk1,Cdk2,Cdk4,Cdkn1b,Cxcr4,Egfr,Gna14,Il2rg,Irak4,Itpr2,Map2k3,Map3k7,Nod1,Pak4,Pfn1,Ppp2r1b,Ripk1,Rps6ka1,Rps6ka3,Sfn,Sla,Stat2,Tnfrsf1a,Traf2
HALLMARK_UV_RESPONSE_DN	0.00017	0.00026	144	35	Adgrl2,Anxa2,Anxa4,Apbb2,Bmpr1a,Cdkn1b,Col11a1,Dab2,Ddah1,Fbln5,Has2,Igfbp5,Irs1,Itgb3,Kit,Lamc1,Mmp16,Myc,Nek7,Nfib,Nfkb1,Nrp1,Pdlim5,Pias3,Pik3cd,Pmp22,Ptpn21,Runx1,Rxra,Sdc2,Slc7a1,Tfpi,Tgfbr2,Tjp1,Zmiz1
HALLMARK_MYOGENESIS	0.00032	0.00047	200	44	Adam12,Aebp1,Agl,Agrn,Akt2,Aplnr,Bag1,Cd36,Cdh13,Cnn3,Des,Efs,Eno3,Ephb3,Erbb3,Fgf2,Flii,Foxo4,Fxyd1,Gpx3,Hbegf,Hspb8,Igf1,Igfbp3,Itga7,Itgb1,Kifc3,Klf5,Mapk12,Myh3,Myo1c,Notch1,Plxnb2,Sgcd,Sirt2,Smtn,Sparc,Sspn,St5,Stc2,Svil,Syngr2,Tgfb1,Wwtr1
HALLMARK_WNT_BETA_CATENIN_SIGNALING	0.0006	0.00086	42	14	Adam17,Axin1,Ccnd2,Peg12,Fzd1,Hey2,Kat2a,Myc,Nkd1,Notch1,Rbpj,Skp2,Trp53,Wnt5b
HALLMARK_CHOLESTEROL_HOMEOSTASIS	0.001	0.0014	74	20	Alcam,Aldoc,Antxr2,Anxa5,Cd9,Cxcl16,Cyp51,Fabp5,Fads2,Fasn,Gusb,Lgmn,Fam129a,Plaur,Plscr1,S100a11,Sema3b,Sqle,Tmem97,Tnfrsf12a
HALLMARK_PROTEIN_SECRETION	0.0011	0.0015	96	24	Abca1,Atp7a,Cd63,Cln5,Ctsc,Dst,Egfr,Gla,Gosr2,Kif1b,Lamp2,Pam,Rab9,Rer1,Rps6ka3,Sec24d,Sec31a,Snap23,Sspn,Tmed10,Tpd52,Tspan8,Vamp3,Ykt6
HALLMARK_DNA_REPAIR	0.0032	0.0042	150	32	Alyref,Aprt,Arl6ip1,Dut,Ell,Eloa,Ercc2,Gtf2b,Hcls1,Lig1,Nelfe,Nme4,Pcna,Pola2,Pold1,Polr1d,Polr2f,Polr3c,Pom121,Prim1,Rad51,Rfc3,Rfc4,Rfc5,Rpa2,Rpa3,Sec61a1,Smad5,Taf13,Trp53,Tyms,Vps37b
HALLMARK_REACTIVE_OXYGEN_SPECIES_PATHWAY	0.0032	0.0042	49	14	Cat,Ercc2,Fes,Ftl1,G6pdx,Gpx3,Gsr,Hhex,Mgst1,Prdx1,Prdx4,Prdx6,Txn1,Txnrd1
HALLMARK_ANGIOGENESIS	0.0049	0.0061	36	11	Ccnd2,Cxcl5,Fgfr1,Lum,Msx1,Nrp1,Postn,S100a4,Timp1,Tnfrsf21,Vcan
HALLMARK_NOTCH_SIGNALING	0.006	0.0073	32	10	Ccnd1,Dtx2,Dtx4,Fzd1,Fzd7,Kat2a,Lfng,Notch1,St3gal6,Tcf7l2

## Sheet: bulk150-down
label	pval	fdr	gset.size	genes.overlap	hits
HALLMARK_UV_RESPONSE_DN	6.3e-11	3.2e-09	144	42	Amph,Arhgef9,Atp2b1,Atp2b4,Atp2c1,Atrn,Atxn1,Bdnf,Bhlhe40,Cacna1a,Cap2,Cdc42bpa,Cdon,Celf2,Cited2,Dbp,Dlc1,Dlg1,Dyrk1a,Fhl2,Gcnt1,Gja1,Inpp4b,Kalrn,Kcnma1,Map1b,Plcb4,Pparg,Prkca,Prkce,Pten,Ptprm,Rasa2,Rgs4,Rnd3,Scn8a,Sipa1l1,Smad7,Spop,Syne1,Togaram1,Vldlr
HALLMARK_APICAL_JUNCTION	2.3e-05	0.00055	199	39	Acta1,Actn1,Actn2,Adamts5,Amigo1,Amigo2,Atp1a3,Baiap2,Cadm2,Cadm3,Cx3cl1,Dlg1,Dmp1,Evl,Gnai1,Gtf2f1,Icam4,Icam5,Jup,Kcnh2,Lama3,Map3k20,Myl12b,Nectin1,Negr1,Nrxn2,Parva,Pbx2,Pcdh1,Ppp2r2c,Pten,Ptk2,Rasa1,Rhof,Shroom2,Sirpa,Thy1,Tro,Ywhah
HALLMARK_HEME_METABOLISM	3.3e-05	0.00055	195	38	Ackr1,Acsl6,Add2,Ank1,Arhgef12,Atp6v0a1,Btg2,Btrc,Car2,Daam1,Dmtn,Ell2,Epor,Ezh1,Fbxo34,Fbxo9,Fn3k,Foxj2,Gde1,Hagh,Icam4,Igsf3,Isca1,Lpin2,Mgst3,Narf,Osbp2,Pcx,Rbm5,Rnf123,Sec14l1,Slc30a1,Snca,Sptb,Synj1,Trak2,Tspan5,Ypel5
HALLMARK_HEDGEHOG_SIGNALING	0.00011	0.0013	36	12	Amot,Cdk5r1,Crmp1,Dpysl2,Ldb1,Nrcam,Rasa1,Rtn1,Scg2,Shh,Thy1,Vldlr
HALLMARK_MYOGENESIS	0.00013	0.0013	200	37	Ablim1,Acta1,Actn2,Adcy9,Ak1,App,Bhlhe40,Bin1,Cacna1h,Camk2b,Casq2,Cdkn1a,Ckb,Eif4a2,Fabp3,Fhl1,Fst,Gabarapl2,Gnao1,Kcnh1,Kcnh2,Large1,Mapre3,Mef2a,Mef2c,Mef2d,Mras,Myh7,Myl1,Mylk,Ncam1,Nos1,Pcx,Ppfia4,Prnp,Rb1,Sptan1
HALLMARK_OXIDATIVE_PHOSPHORYLATION	0.00022	0.0019	198	36	Afg3l2,Alas1,Atp1b1,Atp5a1,Atp5j,Atp6v0c,Atp6v1c1,Atp6v1d,Atp6v1e1,Cox17,Cox5a,Cox5b,Cox8a,Cycs,Dlat,Got2,Idh3b,Isca1,Ldhb,Mdh1,Mgst3,Mrpl11,Ndufa8,Ndufb2,Ndufs1,Ndufs3,Ndufs4,Ndufv1,Opa1,Pdhb,Pdp1,Sdha,Slc25a12,Sucla2,Timm8b,Uqcrc1
HALLMARK_SPERMATOGENESIS	0.00065	0.0046	135	26	Arl4a,Braf,Camk4,Cftr,Chrm4,Clpb,Clvs1,Cnih2,Ddx25,Gad1,Grm8,Hspa2,Hspa4l,Ip6k1,Mtor,Nefh,Nos1,Npy5r,Pacrg,Papolb,Pias2,Scg5,Sept4,Slc12a2,Snap91,Strbp
HALLMARK_MITOTIC_SPINDLE	0.001	0.0065	199	34	Abr,Apc,Arfgef1,Arhgap10,Arhgap27,Arhgef12,Arhgef3,Bin1,Ccdc88a,Cdc42bpa,Cdc42ep2,Clasp1,Clip1,Cyth2,Dlg1,Fgd4,Itsn1,Kifap3,Klc1,Nin,Ppp4r2,Rapgef5,Rasa1,Rasa2,Rasal2,Rhof,Shroom2,Sptan1,Sptbn1,Stk38l,Synpo,Tiam1,Tuba4a,Wasf1

## Sheet: bulk12-up
label	pval	fdr	gset.size	genes.overlap	hits
HALLMARK_MITOTIC_SPINDLE	0.00017	0.0083	199	7	Arhgap4,Cdk1,Kif11,Kntc1,Prc1,Top2a,Tpx2

## Sheet: bulk12-down
label	pval	fdr	gset.size	genes.overlap	hits

## Sheet: bulk90-up
label	pval	fdr	gset.size	genes.overlap	hits

## Sheet: bulk90-down
label	pval	fdr	gset.size	genes.overlap	hits
HALLMARK_ANGIOGENESIS	0.00011	0.0053	36	3	Fstl1,Kcnj8,Vtn

## Sheet: bulk150-up-fc2.0
label	pval	fdr	gset.size	genes.overlap	hits
HALLMARK_INTERFERON_GAMMA_RESPONSE	1.7e-48	8.3e-47	208	110	B2m,Batf2,Bst2,Casp1,Casp4,Casp7,Casp8,Ccl12,Ccl5,Ccl7,Cd274,Cd38,Cd69,Cd74,Cd86,Cfb,Ciita,Cmklr1,Csf2rb2,Cxcl10,Ddx58,Ddx60,Dhx58,Eif2ak2,Epsti1,Fcgr1,Fgl2,Gbp3,Gbp9,Helz2,Herc6,H2-D1,H2-Q1,H2-Q10,H2-Q7,H2-M3,H2-Q6,H2-T23,H2-DMa,H2-Aa,H2-Eb1,Icam1,Ifi27,Ifi30,Ifi35,Ifi44,Ifih1,Ifit2,Ifit3,Ifitm2,Ifitm3,Il10ra,Il18bp,Il2rb,Il4ra,Irf1,Irf5,Irf7,Irf8,Irf9,Isg15,Isg20,Lap3,Lcp2,Lgals3bp,Ly6e,Mt2,Mth…
HALLMARK_E2F_TARGETS	4.4e-44	1.1e-42	200	103	Ak2,Asf1b,Atad2,Aurka,Aurkb,Bard1,Birc5,Brca1,Bub1b,Ccnb2,Ccne1,Cdc20,Cdc25a,Cdc25b,Cdca3,Cdca8,Cdk1,Cdk4,Cdkn1b,Cdkn2a,Cdkn2c,Cdkn3,Cenpe,Cenpm,Chek1,Chek2,Cks1b,Cks2,Ctps,Dclre1b,Dctpp1,Depdc1a,Diaph3,Dlgap5,Dscc1,Dut,E2f8,Espl1,Ezh2,Gins1,H2afx,H2afz,Hells,Hmga1,Hmgb2,Hmmr,Hus1,Kif18b,Kif22,Kif2c,Kif4,Lig1,Lmnb1,Lyar,Mad2l1,Mcm2,Mcm3,Mcm4,Mcm5,Mcm6,Mcm7,Melk,Mki67,Mms22l,Mthfd2,Mxd3,Mybl2,Myc,…
HALLMARK_G2M_CHECKPOINT	2.5e-36	4.2e-35	199	94	Aurka,Aurkb,Bard1,Bcl3,Birc5,Bub1,Ccna2,Ccnb2,Ccnd1,Ccnf,Cdc20,Cdc25a,Cdc25b,Cdc45,Cdc6,Cdk1,Cdk4,Cdkn1b,Cdkn2c,Cdkn3,Cenpa,Cenpe,Cenpf,Chaf1a,Chek1,Cks1b,Cks2,Dbf4,E2f2,E2f3,Egf,Espl1,Exo1,Ezh2,Fbxo5,G3bp1,Gins2,H2afx,H2afz,Hmga1,Hmgn2,Hmmr,Hus1,Kif11,Kif15,Kif20b,Kif22,Kif23,Kif2c,Kif4,Kmt5a,Knl1,Lig3,Lmnb1,Mad2l1,Mcm2,Mcm3,Mcm5,Mcm6,Mki67,Mt2,Mybl2,Myc,Nasp,Nek2,Nusap1,Odc1,Pbk,Plk1,Plk4,Pola2…
HALLMARK_INTERFERON_ALPHA_RESPONSE	6.1e-36	7.7e-35	102	65	B2m,Batf2,Bst2,Casp1,Casp8,Cd74,Csf1,Cxcl10,Ddx60,Dhx58,Eif2ak2,Elf1,Epsti1,Gbp2,Gbp3,Helz2,Herc6,H2-D1,H2-M3,H2-Q10,H2-Q7,H2-T23,Ifi27,Ifi30,Ifi35,Ifi44,Ifih1,Ifit2,Ifit3,Ifitm2,Ifitm3,Il4ra,Irf1,Irf7,Irf9,Isg15,Isg20,Lap3,Lgals3bp,Ly6e,Mov10,Nmi,Oasl1,Parp12,Parp14,Parp9,Plscr1,Psmb8,Psmb9,Psme1,Ripk2,Rsad2,Rtp4,Samd9l,Sp110,Stat2,Tap1,Tmem140,Trim14,Trim21,Trim25,Txnip,Uba7,Ube2l6,Usp18
HALLMARK_ALLOGRAFT_REJECTION	7.5e-29	7.5e-28	204	86	B2m,Bcl3,Brca1,C2,Capg,Ccl7,Ccl12,Ccl4,Ccl5,Ccnd2,Ccnd3,Ccr2,Cd3e,Cd4,Cd74,Cd86,Cd8a,Cdkn2a,Csf1,Ctss,Cxcl13,Egfr,Eif3j1,Eif5a,Elf4,Ets1,F2r,Fcgr2b,Fgr,Flna,Fyb,Gbp2,Gpr65,Hcls1,H2-D1,H2-Q1,H2-Q10,H2-Q7,H2-DMa,H2-DMb2,H2-Aa,H2-T23,H2-M3,Icam1,Icosl,Ifngr1,Ifngr2,Igsf6,Il16,Il18rap,Il1b,Il2rb,Il2rg,Il4ra,Inhbb,Irf7,Irf8,Itgal,Itgb2,Lcp2,Lif,Ly75,Ly86,Lyn,Map4k1,Ncf4,Nos2,Psmb10,Ptpn6,Ptprc,Ripk2,R…
HALLMARK_EPITHELIAL_MESENCHYMAL_TRANSITION	4.5e-28	3.7e-27	200	84	Adam12,Bgn,Calu,Capg,Cd44,Cdh6,Col11a1,Col16a1,Col4a1,Col5a3,Crlf1,Cxcl1,Cxcl5,Dab2,Dcn,Dpysl3,Dst,Eln,Fbln1,Fbln2,Fbln5,Fbn1,Fermt2,Fgf2,Flna,Foxc2,Fuca1,Gadd45a,Gas1,Glipr1,Gpc1,Gpx7,Igfbp2,Igfbp3,Igfbp4,Itga2,Itga5,Itgb1,Itgb3,Lama1,Lamc1,Lgals1,Lox,Loxl1,Lum,Mcm7,Mgp,Mmp14,Mmp2,Msx1,Nid2,P3h1,Pcolce2,Pdlim4,Plaur,Plod1,Plod3,Pmp22,Postn,Prrx1,Ptx3,Sat1,Sdc1,Sdc4,Serpine2,Sfrp4,Sgcd,Slit2,Sntb…
HALLMARK_INFLAMMATORY_RESPONSE	1.7e-18	1.2e-17	199	70	Adgre1,Ahr,Aplnr,Aqp9,Axl,Bst2,C3ar1,Ccl12,Ccl5,Ccl7,Cd14,Cd69,Clec5a,Cmklr1,Csf1,Csf3r,Cxcl10,Cxcl5,Cybb,Eif2ak2,Has2,Hbegf,Icam1,Icosl,Ifngr2,Il10ra,Il18rap,Il1a,Il1b,Il1r1,Il2rb,Il4ra,Irf1,Irf7,Itga5,Itgb3,Klf6,Lcp2,Lif,Ly6e,Lyn,Mmp14,Msr1,Myc,Nmi,Nod2,Osmr,P2rx4,P2rx7,P2ry2,Pdpn,Plaur,Ptafr,Rela,Rgs1,Rgs16,Rhog,Ripk2,Rnf144b,Rtp4,Slc7a1,Slc7a2,Tapbp,Timp1,Tlr1,Tlr2,Tlr3,Tnfaip6,Tnfrsf1b,Tnfsf9
HALLMARK_KRAS_SIGNALING_UP	1.9e-18	1.2e-17	204	71	Adam17,Akap12,Akt2,Aldh1a3,Ammecr1,Angptl4,C3ar1,Ccnd2,Cd37,Cfb,Clec4a3,Cmklr1,Crot,Ctss,Cxcl10,Cxcr4,Dock2,Dusp6,Emp1,Ephb2,Ets1,Etv4,Etv5,Fcer1g,Flt4,Fuca1,G0s2,Galnt3,Gpnmb,Gypc,Hbegf,Hist1h2bb,Igfbp3,Ikzf1,Il10ra,Il1b,Il2rg,Irf8,Itga2,Itgb2,Laptm5,Lat2,Lcp1,Lif,Mafb,Map4k1,Mmp11,Nrp1,Plat,Plau,Plaur,Prkg2,Prrx1,Psmb8,Rgs16,Satb1,Sema3b,Serpina3n,Slpi,Sox9,Spon1,Spry2,St6gal1,Tfpi,Tlr8,Tmem176…
HALLMARK_IL2_STAT5_SIGNALING	9.7e-18	5.4e-17	200	69	Adam19,Ahr,Alcam,Anxa4,Bcl2,Capg,Capn3,Ccnd2,Ccnd3,Ccne1,Cd44,Cd83,Cd86,Cdc6,Cdkn1c,Ckap4,Csf1,Cst7,Ctsz,Cxcl10,Dhrs3,Emp1,Eno3,Enpp1,Etv4,Fgl2,Galm,Gbp3,Glipr2,Gpr65,Hipk2,Hk2,Ifitm3,Ifngr1,Il10ra,Il2rb,Il4ra,Irf8,Itgae,Itih5,Klf6,Lif,Lrig1,Lrrc8c,Mapkapk2,Myc,Myo1c,Nop2,Nrp1,Odc1,P2rx4,Plin2,Plscr1,Pus1,Rgs16,Rhoh,Rnh1,S100a1,Slc1a5,Smpdl3a,Snx9,Spry4,Swap70,Syngr2,Tgm2,Tlr7,Tnfrsf1b,Twsg1,Uck2
HALLMARK_TNFA_SIGNALING_VIA_NFKB	2.4e-15	1.2e-14	200	65	B4galt1,Bcl2a1a,Bcl3,Btg3,Ccl12,Ccl4,Ccl5,Ccnd1,Cd44,Cd69,Cd83,Cebpb,Cebpd,Clcf1,Csf1,Cxcl1,Cxcl10,Cxcl5,Ddx58,Dusp2,Efna1,Ehd1,Fut4,G0s2,Gadd45a,Hbegf,Icam1,Icosl,Ier3,Ifih1,Ifit2,Ifngr2,Il1a,Il1b,Il6st,Irf1,Klf6,Lif,Litaf,Map2k3,Myc,Nfkb2,Pdlim5,Pfkfb3,Plau,Plaur,Plek,Ptx3,Rela,Relb,Ripk2,Sat1,Sdc4,Socs3,Spsb1,Tap1,Tgif1,Tlr2,Tnc,Tnfaip2,Tnfaip6,Tnfsf9,Trib1,Zbtb10,Zfp36
HALLMARK_MITOTIC_SPINDLE	3.3e-13	1.5e-12	199	61	Akap13,Arhgdia,Aurka,Bcar1,Birc5,Bub1,Ccnb2,Cdc42ep1,Cdc42ep4,Cdk1,Cdk5rap2,Cenpe,Cenpf,Cenpj,Cep192,Cntrl,Dlgap5,Dock2,Dst,Ect2,Epb41,Epb41l2,Espl1,Ezr,Fbxo5,Flna,Flnb,Kif11,Kif15,Kif20b,Kif22,Kif23,Kif2c,Kif4,Kntc1,Llgl1,Lmnb1,Mapre1,Mid1,Nedd9,Nek2,Nusap1,Palld,Pdlim5,Pif1,Plekhg2,Plk1,Prc1,Prex1,Pxn,Rab3gap1,Racgap1,Sass6,Sept9,Smc4,Top2a,Tpx2,Trio,Ttk,Tubd1,Wasf2
HALLMARK_IL6_JAK_STAT3_SIGNALING	3.5e-13	1.5e-12	88	37	A2m,Bak1,Ccl7,Cd14,Cd36,Cd38,Cd44,Cd9,Csf1,Csf2rb2,Csf3r,Cxcl1,Cxcl10,Cxcl13,Hmox1,Ifngr1,Ifngr2,Il17ra,Il1b,Il1r1,Il2rg,Il4ra,Il6st,Irf1,Irf9,Itgb3,Ltbr,Osmr,Socs3,Stat1,Stat2,Stat3,Tgfb1,Tlr2,Tnfrsf12a,Tnfrsf1a,Tnfrsf1b
HALLMARK_APOPTOSIS	7.1e-12	2.7e-11	161	51	Anxa1,Bgn,Bmf,Brca1,Btg3,Casp1,Casp4,Casp7,Casp8,Ccnd1,Ccnd2,Cd14,Cd38,Cd44,Cd69,Cdc25b,Cdk2,Cdkn1b,Cth,Dap,Dcn,Diablo,Emp1,Erbb3,F2r,Gadd45a,Gpx3,Gucy2e,Hmgb2,Hmox1,Ier3,Ifitm3,Ifngr1,Il1a,Il1b,Irf1,Isg20,Lum,Mmp2,Nedd9,Plat,Rela,Sat1,Satb1,Tap1,Timp1,Timp3,Tnfrsf12a,Top2a,Tspo,Txnip
HALLMARK_P53_PATHWAY	1.4e-09	5e-09	200	54	Abhd4,Aen,Bak1,Casp1,Ccnd2,Ccnd3,Cdkn2a,Cdkn2b,Cebpa,Ctsd,F2r,Fuca1,Gadd45a,Hbegf,Hmox1,Ier3,Ifi30,Il1a,Inhbb,Klk8,Lif,Lrmp,Notch1,Nupr1,Pcna,Pidd1,Plxnb2,Rack1,Rgs16,Rhbdf2,Rpl18,Rps27l,Rrad,Rxra,S100a4,Sat1,Sdc1,Sec61a1,Sfn,Slc7a11,Stom,Tap1,Tax1bp3,Tcn2,Tgfa,Tgfb1,Tnfsf9,Trp63,Traf4,Txnip,Upp1,Vamp8,Vdr,Zfp36l1
HALLMARK_COMPLEMENT	6.6e-09	2.2e-08	197	52	Anxa5,Apobec3,C1qa,C1qc,C2,C3,Casp1,Casp4,Casp7,Ccl5,Cd36,Cebpb,Cfb,Cp,Cpm,Cpq,Ctsc,Ctsd,Ctsh,Ctss,Cxcl1,Dock9,Dusp6,Ehd1,Fcer1g,Irf1,Irf7,Itgam,Kcnip3,Lamp2,Lap3,Lcp2,Lgmn,Lipa,Lyn,Me1,Mmp14,Mmp15,Pfn1,Phex,Pik3cg,Plat,Plaur,Plek,Plscr1,Prkcd,Psmb9,Rhog,S100a13,Serping1,Timp1,Was
HALLMARK_ESTROGEN_RESPONSE_LATE	3.3e-08	1e-07	206	52	Abhd2,Aff1,Ascl1,Bag1,Bcl2,Btg3,Ccnd1,Cd44,Cd9,Cdc20,Cdc6,Cyp26b1,Dusp2,Fabp5,Fgfr3,Flnb,Gal,Gins2,Hr,Hspb8,Igfbp4,Il6st,Impa2,Isg20,Kif20a,Mdk,Myb,Nbl1,Opn3,Pdlim3,Plk4,Plxnb1,Ptpn6,Rab31,Rbbp8,Ret,Scarb1,Sema3b,Serpina3n,Sfn,Slc16a1,Slc1a4,Slc26a2,Slc29a1,Slc7a5,Sox3,Stil,Top2a,Tspan13,Tst,Ugdh,Zfp36
HALLMARK_APICAL_JUNCTION	1.9e-07	5.5e-07	199	49	Actb,Adam23,Akt2,B4galt1,Cd274,Cd86,Cdh3,Cdh6,Cdk8,Cntn1,Col16a1,Col9a1,Ctnna1,Egfr,Epb41l2,Fbn1,Flnc,Fyb,Hadh,Icam1,Inppl1,Irs1,Itga2,Itga9,Itgb1,Lima1,Mdk,Mmp2,Mpzl1,Msn,Nectin2,Nexn,Nf2,Pfn1,Ptprc,Rac2,Rras,Rsu1,Sdc3,Shc1,Skap2,Slit2,Syk,Tgfbi,Tspan4,Vasp,Vcam1,Vcan,Wnk4
HALLMARK_ESTROGEN_RESPONSE_EARLY	2.2e-07	5.8e-07	200	49	Abhd2,Aff1,B4galt1,Bag1,Bcl2,Ccnd1,Cd44,Cyp26b1,Dhrs3,Elf1,Flnb,Gab2,Gfra1,Hr,Hspb8,Igfbp4,Il6st,Inhbb,Isg20l2,Lrig1,Mindy1,Mlph,Myb,Mybbp1a,Mybl1,Myc,Nbl1,Olfml3,Opn3,P2ry2,Pdlim3,Rab31,Rbbp8,Ret,Rhobtb3,Scarb1,Sema3b,Sfn,Slc16a1,Slc1a4,Slc26a2,Slc7a2,Slc7a5,Sox3,Stc2,Tgif2,Tgm2,Tmem164,Tsku
HALLMARK_MTORC1_SIGNALING	2.2e-07	5.8e-07	200	49	Acaca,Ak4,Aurka,Bub1,Ccnf,Cd9,Cdc25a,Coro1a,Cth,Ctsc,Cxcr4,Dhfr,Edem1,Elovl6,Fgl2,G6pdx,Hk2,Ifi30,Igfbp5,Itgb2,Lgmn,Map2k3,Mcm2,Mcm4,Me1,Mthfd2,Fam129a,Nupr1,Pgm1,Phgdh,Plk1,Prdx1,Psat1,Psph,Rpa1,Rrm2,Serp1,Shmt2,Skap2,Sla,Slc1a4,Slc1a5,Slc7a11,Slc7a5,Srd5a1,Tes,Tmem97,Txnrd1,Ung
HALLMARK_HYPOXIA	2.6e-07	6.4e-07	201	49	Ak4,Akap12,Angptl4,Anxa2,Bcan,Bcl2,Bgn,Cdkn1b,Cdkn1c,Chst3,Cp,Csrp2,Cxcr4,Dcn,Efna1,Egfr,Eno3,Ets1,Gpc1,Hk2,Hmox1,Ier3,Igfbp3,Isg20,Kdelr3,Klf6,Lox,Lxn,Mt2,Ncan,Noct,Pfkfb3,Pgm1,Plaur,Plin2,S100a4,Scarb1,Sdc3,Sdc4,Selenbp1,Slc25a1,Srpx,Stc2,Tes,Tgfbi,Tgm2,Tktl1,Tpd52,Zfp36
HALLMARK_COAGULATION	3.8e-07	9.1e-07	141	38	A2m,Anxa1,C1qa,C2,C3,Capn5,Cd9,Cfb,Cfi,Cpq,Ctse,Ctsh,Dusp6,F9,Fbn1,Gng12,Itga2,Itgb3,Klk8,Lamp2,Lgmn,Mmp11,Mmp14,Mmp15,Mmp2,P2ry1,Plat,Plau,Plek,Pros1,S100a1,S100a13,Serping1,Sirt2,Sparc,Thbs1,Timp1,Timp3
HALLMARK_MYC_TARGETS_V1	5.6e-07	1.3e-06	200	48	Aimp2,Cad,Ccna2,Cct3,Cdc20,Cdc45,Cdk2,Cdk4,Ctps,Ddx21,Dut,Eif3b,Eif3j1,Fbl,G3bp1,Gnl3,H2afz,Hddc2,Hdgf,Kars,Lsm2,Mad2l1,Mcm2,Mcm4,Mcm5,Mcm6,Mcm7,Myc,Nhp2,Odc1,Pabpc1,Pabpc4,Pcna,Pold2,Prdx4,Rack1,Rfc4,Rpl18,Rpl22,Rplp0,Rps2,Rps3,Rrm1,Ruvbl2,Srm,Tfdp1,Tyms,Usp1
HALLMARK_MYC_TARGETS_V2	3.9e-06	8.4e-06	58	20	Aimp2,Cdk4,Dctpp1,Dusp2,Gnl3,Hk2,Mcm4,Mcm5,Mrto4,Mybbp1a,Myc,Noc4l,Nop2,Pes1,Plk1,Plk4,Pus1,Srm,Tmem97,Ung
HALLMARK_UV_RESPONSE_UP	3.4e-05	7.1e-05	162	37	Bak1,Btg3,Ccnd3,Ccne1,Cdk2,Cdkn1c,Cdkn2b,Col2a1,Cxcl1,Ddx21,Gal,Gpx3,H2afx,H2-T23,H2-D1,H2-M3,H2-Q10,H2-Q7,Hmox1,Hyal2,Icam1,Igfbp2,Il6st,Irf1,Lyn,Mmp14,Msx1,Nat2,Pdlim3,Prkcd,Ret,Rfc4,Rrad,Shox2,Sigmar1,Tap1,Tst
HALLMARK_ANDROGEN_RESPONSE	0.00012	0.00024	111	27	Abcc4,Abhd2,Adamts1,Akap12,Aldh1a3,B2m,B4galt1,Bmpr1b,Ccnd1,Ccnd3,Cdk6,Cenpn,Dbi,Hpgd,Iqgap2,Myl12a,Nkx3-1,Pdlim5,Ptpn21,Sat1,Sec24d,Slc26a2,Steap4,Tpd52,Ube2i,Xrcc5,Zbtb10
HALLMARK_GLYCOLYSIS	0.00018	0.00034	200	41	Agl,Ak4,Angptl4,Aurka,B4galt1,Capn5,Cd44,Cdk1,Cenpa,Cth,Cxcr4,Dcn,Depdc1a,Egfr,G6pdx,Gal3st1,Gpc1,Gusb,Hk2,Hmmr,Idua,Ier3,Igfbp3,Isg20,Kdelr3,Kif20a,Lhpp,Me1,Nasp,Pgls,Plod1,Sdc1,Sdc3,Slc25a13,Sox9,Srd5a3,Stc2,Tgfa,Tgfbi,Tktl1,Vcan
HALLMARK_XENOBIOTIC_METABOLISM	0.00022	0.00041	202	41	Abcc2,Abcc3,Aox1,Apoe,Aqp9,Atoh8,Bcar1,Cat,Cd36,Cfb,Crot,Csad,Cyp2j9,Ddah2,Esr1,Fbln1,Gart,Hes6,Hmox1,Igf1,Igfbp4,Il1r1,Irf8,Kars,Lcat,Mt2,Pdlim5,Pgd,Pros1,Psmb10,Ptgr1,Pycr1,Rap1gap,Shmt2,Slc12a4,Slc1a5,Tmem176b,Tmem97,Tnfrsf1a,Ugdh,Upp1
HALLMARK_MYOGENESIS	0.00071	0.0013	200	39	Adam12,Aebp1,Agl,Akt2,Aplnr,Bag1,Cd36,Cnn3,Des,Efs,Eno3,Ephb3,Erbb3,Fgf2,Foxo4,Fxyd1,Gpx3,Hbegf,Hspb8,Igf1,Igfbp3,Itga7,Itgb1,Kifc3,Klf5,Mapk12,Myh3,Myo1c,Notch1,Plxnb2,Sgcd,Sirt2,Smtn,Sparc,St5,Stc2,Syngr2,Tgfb1,Wwtr1
HALLMARK_ADIPOGENESIS	0.0014	0.0023	200	38	Acadl,Acads,Ak2,Angpt1,Angptl4,Apoe,C3,Cat,Cd151,Cd36,Cdkn2c,Col4a1,Cpt2,Decr1,Elovl6,Esyt1,Gadd45a,Gpam,Gpx3,Hadh,Hspb8,Ifngr1,Itga7,Itih5,Lama4,Marc2,Me1,Pfkfb3,Pgm1,Plin2,Reep6,Scarb1,Slc1a5,Slc25a1,Sowahc,Stom,Tst,Ucp2
HALLMARK_PI3K_AKT_MTOR_SIGNALING	0.0018	0.0029	105	23	Acaca,Akt1s1,Arhgdia,Cdk1,Cdk2,Cdk4,Cdkn1b,Cxcr4,Egfr,Gna14,Il2rg,Irak4,Itpr2,Map2k3,Nod1,Pfn1,Ripk1,Rps6ka1,Sfn,Sla,Stat2,Tnfrsf1a,Traf2
HALLMARK_UV_RESPONSE_DN	0.0039	0.0062	144	28	Adgrl2,Anxa2,Anxa4,Cdkn1b,Col11a1,Dab2,Ddah1,Fbln5,Has2,Igfbp5,Irs1,Itgb3,Kit,Lamc1,Mmp16,Myc,Nfib,Nrp1,Pdlim5,Pias3,Pik3cd,Pmp22,Ptpn21,Runx1,Rxra,Slc7a1,Tfpi,Tgfbr2

## Sheet: bulk150-down-fc2.0
label	pval	fdr	gset.size	genes.overlap	hits
HALLMARK_UV_RESPONSE_DN	5.9e-09	3e-07	144	35	Amph,Arhgef9,Atp2b1,Atp2b4,Atp2c1,Atxn1,Bdnf,Bhlhe40,Cap2,Cdon,Celf2,Cited2,Dlc1,Dlg1,Fhl2,Gcnt1,Gja1,Inpp4b,Kalrn,Kcnma1,Map1b,Plcb4,Pparg,Prkca,Prkce,Pten,Ptprm,Rasa2,Rgs4,Rnd3,Scn8a,Sipa1l1,Smad7,Syne1,Togaram1

## Sheet: bulk12-up-fc2.0
label	pval	fdr	gset.size	genes.overlap	hits
HALLMARK_MITOTIC_SPINDLE	4.9e-09	2.4e-07	199	7	Arhgap4,Cdk1,Kif11,Kntc1,Prc1,Top2a,Tpx2
HALLMARK_G2M_CHECKPOINT	1.7e-07	4.3e-06	199	6	Cdk1,Kif11,Pbk,Prc1,Top2a,Tpx2

## Sheet: bulk12-down-fc2.0
label	pval	fdr	gset.size	genes.overlap	hits

[truncated: 2 more sheets: bulk90-up-fc2.0, bulk90-down-fc2.0]
